# Supplementary material for: Psychometric properties of the Chinese version physical literacy assessment questionnaire among high school students in Gansu, China
Source: PeerJ journal article supplement (doi:10.7717/peerj.19093), 2025-04-09
Supplement: questionnaire.pdf [file questionnaire.pdf]

## E: The Portuguese Physical Literacy Assessment Questionnaire

**Instruction:** Please rate the following statements as they pertain to you with a value of 0,1,2,3 or 4 according to the specified scale.

# Portuguese Physical Literacy Assessment Questionnaire (PPLA-Q)

name:                      school:                      gende:                      Student ID:

For the next question group, you should remember that PA = Physical Activity(ies), and includes every situation that require movement, like your Physical Education classes, sport-based activities (team or individual), rhythmic activities (e.g., dance), exercise (e.g., strength training, jogging), and any activities that you use as a mean of transportation or in your spare time.

In each statement below, select how much it describes you, circling one of the options from 0 to 4 0 =

*Not at all*; 1 = *Slightly*; 2 = *Moderately*; 3 = *Quite a lot*; 4 = *Totally*).

### How much do these statements describe you?

|                                                                       |   |   |   |   |   |
|-----------------------------------------------------------------------|---|---|---|---|---|
| P1. I am motivated to practice PA                                     | 0 | 1 | 2 | 3 | 4 |
| P2. I practice PA because others tell me I should                     | 0 | 1 | 2 | 3 | 4 |
| P3. I feel guilty when I do not practice PA                           | 0 | 1 | 2 | 3 | 4 |
| P4. I feel bad about myself when I do not practice PA                 | 0 | 1 | 2 | 3 | 4 |
| P5. I feel pressured by others to practice PA                         | 0 | 1 | 2 | 3 | 4 |
| P6. I practice PA because I feel others would be unhappy if I did not | 0 | 1 | 2 | 3 | 4 |
| P7. I practice PA because it is fun                                   | 0 | 1 | 2 | 3 | 4 |
| P8. I feel good when I practice PA                                    | 0 | 1 | 2 | 3 | 4 |
| P9. I consider PA a part of me                                        | 0 | 1 | 2 | 3 | 4 |
| P10. I value the benefits of PA                                       | 0 | 1 | 2 | 3 | 4 |
| P11. I see PA as a fundamental part of who I am                       | 0 | 1 | 2 | 3 | 4 |
| P12. I enjoy practicing PA                                            | 0 | 1 | 2 | 3 | 4 |
| P13. I feel confident to practice PA                                  | 0 | 1 | 2 | 3 | 4 |

### In Physical Activity contexts:

|                                                          |   |   |   |   |   |
|----------------------------------------------------------|---|---|---|---|---|
| P14. I am confident in my abilities                      | 0 | 1 | 2 | 3 | 4 |
| P15. I can participate with success                      | 0 | 1 | 2 | 3 | 4 |
| P16. I consider myself competent                         | 0 | 1 | 2 | 3 | 4 |
| P17. I trust my skills                                   | 0 | 1 | 2 | 3 | 4 |
| P18. I feel good about the way I am able to participate  | 0 | 1 | 2 | 3 | 4 |
| P19. I can participate in PA that I consider challenging | 0 | 1 | 2 | 3 | 4 |
| P20. I know how to become more confident in myself       | 0 | 1 | 2 | 3 | 4 |
| P21. I feel competent even when I am criticized          | 0 | 1 | 2 | 3 | 4 |

|                                           |   |   |   |   |   |
|-------------------------------------------|---|---|---|---|---|
| P22. I believe in myself even when I lose | 0 | 1 | 2 | 3 | 4 |
| P23. I can manage my emotions             | 0 | 1 | 2 | 3 | 4 |
| P24. I can recognize other's emotions     | 0 | 1 | 2 | 3 | 4 |
| P25. I can recognize my emotions          | 0 | 1 | 2 | 3 | 4 |

In Physical Activity contexts:

|                                                                       |   |   |   |   |   |
|-----------------------------------------------------------------------|---|---|---|---|---|
| P26. I am sensitive to the feelings of others                         | 0 | 1 | 2 | 3 | 4 |
| P27. I understand what others feel                                    | 0 | 1 | 2 | 3 | 4 |
| P28. I can identify what I feel                                       | 0 | 1 | 2 | 3 | 4 |
| P29. I can anticipate what I will feel                                | 0 | 1 | 2 | 3 | 4 |
| P30. I can deal with difficulties rationally                          | 0 | 1 | 2 | 3 | 4 |
| P31. I can manage my emotions when necessary                          | 0 | 1 | 2 | 3 | 4 |
| P32. I have a good control of my emotions                             | 0 | 1 | 2 | 3 | 4 |
| P33. I can manage my effort                                           | 0 | 1 | 2 | 3 | 4 |
| P34. I know when I am tired                                           | 0 | 1 | 2 | 3 | 4 |
| P35. I can recognize changes in my breathing                          | 0 | 1 | 2 | 3 | 4 |
| P36. I can recognize changes in my heart rate                         | 0 | 1 | 2 | 3 | 4 |
| P37. I recognize my physical limits                                   | 0 | 1 | 2 | 3 | 4 |
| P38. I can recognize the effect that different intensities have in me | 0 | 1 | 2 | 3 | 4 |
| P39. I use strategies to manage my effort                             | 0 | 1 | 2 | 3 | 4 |
| P40. I can anticipate when I will be fatigued                         | 0 | 1 | 2 | 3 | 4 |
