# Supplementary material for: Psychometric properties of the Chinese version physical literacy assessment questionnaire among high school students in Gansu, China
Source: PeerJ. 2025 Apr 9;13:e19093. doi: 10.7717/peerj.19093 (PMC11992972; doi:10.7717/peerj.19093)
Supplement: Supplemental Information 1 [file peerj-13-19093-s001.xlsx]

## Sheet: PPLA-Q
P1. I am motivated to practice PA	P2. I practice PA because others tell me I should	P3. I feel guilty when I do not practice PA	P4. I feel bad about myself when I do not practice PA	P5. I feel pressured by others to practice PA	P6. I practice PA because I feel others would be unhappy if I did not	P7. I practice PA because it is fun	P8. I feel good when I practice PA	P9. I consider PA a part of me	P10. I value the benefits of PA	P11. I see PA as a fundamental part of who I am	P12. I enjoy practicing PA	P13. I feel confident to practice PA	P14. I am confident in my abilities	P15. I can participate with success	P16. I consider myself competent	P17. I trust my skills	P18. I feel good about the way I am able to participate	P19. I can participate in PA that I consider challenging	P20. I know how to become more confident in myself	P21. I feel competent even when I am criticized	P22. I believe in myself even when I lose	P23. I can manage my emotions	P24. I can recognize other’s emotions	P25. I can recognize my emotions	P26. I am sensitive to the feelings of others	P27. I understand what others feel	P28. I can identify what I feel	P29. I can anticipate what I will feel	P30. I can deal with difficulties rationally	P31. I can manage my emotions when necessary	P32. I have a good control of my emotions	P33. I can manage my effort	P34. I know when I am tired	P35. I can recognize changes in my breathing	P36. I can recognize changes in my heart rate	P37. I recognize my physical limits	P38. I can recognize the effect that different intensities have in me	P39. I use strategies to manage my effort	P40. I can anticipate when I will be fatigued
3	1	2	2	2	2	4	3	2	1	1	1	2	1	1	1	1	2	2	1	2	2	1	2	3	3	2	2	3	3	3	1	1	2	1	1	1	2	1	3
4	2	3	4	2	3	3	3	4	3	3	4	2	4	5	5	4	3	4	5	4	4	5	3	5	3	4	3	5	3	3	4	3	3	2	3	2	3	5	3
2	1	1	1	2	2	1	1	2	2	3	4	4	4	5	3	3	3	3	5	1	1	1	2	1	2	1	1	2	1	1	1	1	1	1	2	1	2	1	1
2	1	1	1	1	1	2	2	1	1	2	1	2	1	2	2	2	1	1	2	1	2	1	2	1	1	2	1	3	3	1	1	1	1	2	1	1	1	2	2
1	1	2	1	1	1	1	1	1	1	1	3	3	2	2	2	2	3	1	2	2	3	2	3	3	3	3	2	2	3	3	3	3	4	5	3	2	4	2	3
4	2	4	4	4	2	3	5	4	4	5	3	3	2	5	3	3	3	1	4	2	3	2	2	2	3	2	4	3	3	3	4	4	5	5	2	2	3	4	4
3	1	2	1	1	2	1	1	1	1	4	5	4	4	3	5	3	3	3	5	1	3	3	2	3	3	4	3	3	5	3	3	2	1	2	3	2	3	2	2
1	2	3	3	2	2	3	2	2	1	3	2	2	1	2	2	2	2	2	2	1	1	1	3	3	2	2	2	3	2	3	4	3	5	2	5	4	4	2	3
3	2	4	5	2	2	3	2	3	5	3	5	3	2	3	3	4	3	5	4	2	5	2	3	3	3	3	3	3	3	4	5	5	3	5	3	5	5	4	3
1	1	1	1	1	2	2	1	1	1	3	3	3	2	2	3	3	3	2	3	2	2	4	3	2	3	3	5	3	3	2	1	3	2	1	1	1	2	1	1
1	1	1	1	1	1	1	1	1	1	2	1	2	1	1	2	2	2	1	1	1	1	1	1	1	1	1	1	1	1	1	2	2	2	2	4	1	2	2	2
3	2	3	1	2	2	3	2	2	2	1	1	1	1	1	2	1	3	1	2	2	2	2	2	2	2	3	1	1	2	2	2	3	2	2	2	1	2	1	2
2	1	1	2	2	2	2	3	2	2	1	3	2	1	3	4	3	2	1	2	2	3	2	5	3	5	3	4	3	5	3	3	4	3	2	3	2	2	2	3
1	1	1	1	1	2	1	1	2	1	1	1	1	1	2	2	1	3	1	1	1	1	1	1	1	1	2	1	2	2	1	1	1	1	1	1	2	1	1	1
1	1	2	1	2	1	3	1	2	3	3	3	5	2	3	3	2	2	2	3	2	3	4	2	1	2	2	2	1	3	1	1	2	1	1	2	1	1	1	1
2	1	3	2	1	2	3	2	3	2	1	1	2	1	2	1	2	3	1	2	2	5	4	5	3	3	3	3	5	4	5	5	5	4	2	5	2	3	5	5
3	3	2	2	5	4	3	2	2	3	1	2	1	1	1	2	1	2	1	2	3	2	2	3	1	3	2	5	3	3	4	4	4	3	2	5	1	3	2	1
3	4	2	3	5	2	2	3	2	3	3	1	3	1	2	1	1	2	1	1	1	1	1	1	3	2	1	3	2	2	3	4	2	3	2	3	2	3	2	4
3	4	5	2	3	2	5	3	3	3	4	3	3	2	3	4	3	4	2	3	2	2	2	2	3	1	2	3	2	3	3	3	4	3	3	5	2	3	5	4
1	1	1	1	1	2	2	1	1	1	1	1	1	1	2	2	1	2	1	1	2	1	2	1	1	2	2	3	3	2	3	1	1	2	1	1	2	1	1	2
3	2	5	3	5	5	2	4	3	3	2	3	2	1	2	2	5	2	1	3	2	2	2	3	2	3	3	3	3	3	3	4	4	3	2	5	2	3	4	4
4	4	4	3	4	2	3	4	4	4	1	2	2	1	1	2	2	3	2	2	2	1	2	3	2	3	2	5	2	3	3	4	3	3	2	3	3	5	2	3
3	2	3	1	2	3	3	3	3	2	3	5	4	5	5	4	4	5	3	5	2	1	1	2	1	1	2	1	3	1	2	2	3	3	1	3	2	3	1	3
2	1	1	1	1	1	1	1	2	2	2	1	2	1	3	1	1	1	1	2	1	1	1	1	1	1	1	2	2	2	2	1	3	2	1	1	1	3	1	2
1	2	1	1	2	5	4	3	2	5	3	4	4	3	2	3	3	3	2	4	4	4	2	3	2	3	4	3	2	3	3	3	3	3	2	4	1	2	1	1
2	2	1	1	1	2	2	1	2	3	2	3	2	2	1	2	2	2	2	2	2	3	2	3	3	5	2	4	3	2	2	1	2	3	2	1	1	1	1	2
2	1	2	2	2	1	1	2	1	1	2	2	2	2	2	1	3	3	1	3	2	1	1	3	1	2	3	2	3	2	2	2	2	1	1	1	1	1	1	1
1	1	3	2	1	3	2	2	2	2	1	1	1	1	1	1	1	2	1	1	2	3	2	3	3	3	3	2	3	3	4	3	3	3	2	3	2	3	2	2
2	1	2	2	2	2	2	1	2	1	5	3	4	2	4	2	5	3	1	5	1	1	1	1	1	2	1	2	1	3	3	3	5	5	2	5	3	4	2	5
3	4	3	3	4	2	5	5	3	3	5	5	5	4	5	3	5	3	2	3	2	3	2	2	3	3	5	3	5	3	2	3	1	2	1	3	3	2	2	3
1	1	1	1	1	2	1	1	1	1	1	1	1	1	1	2	3	1	1	1	1	1	1	1	1	1	1	3	1	3	1	1	1	1	1	1	1	2	1	1
1	1	1	1	1	2	1	2	1	1	4	3	3	2	3	3	1	3	1	2	1	1	2	3	3	3	4	4	3	4	2	1	2	3	2	1	1	1	2	1
3	4	4	3	4	4	5	5	2	3	2	3	2	1	2	2	3	3	1	3	1	2	2	3	2	2	2	1	3	3	3	3	3	3	2	5	2	2	2	3
3	2	4	3	2	2	3	3	3	3	1	1	2	1	1	2	3	3	2	3	1	1	1	1	1	1	2	1	2	2	1	1	1	1	1	2	1	1	1	2
3	2	2	5	2	3	3	3	3	4	4	3	5	2	2	3	4	3	2	4	1	2	2	3	2	2	2	2	1	2	4	2	3	3	1	5	2	3	3	3
1	1	2	1	1	1	2	1	2	2	2	3	3	3	3	2	4	3	3	3	1	2	1	1	1	2	1	1	1	2	3	3	3	3	2	3	2	3	2	3
2	1	1	1	1	1	2	1	2	1	1	2	2	1	1	2	2	1	1	2	1	1	2	2	1	2	2	3	3	1	1	1	1	1	1	1	1	1	1	3
1	1	2	1	1	1	1	1	2	1	2	1	1	2	1	1	3	3	1	2	2	1	1	2	1	1	2	1	3	2	3	2	3	3	1	3	2	3	1	3
3	3	2	5	3	2	3	5	3	5	5	3	3	2	3	5	3	3	3	3	1	1	1	1	1	2	1	2	1	2	3	3	2	3	1	3	2	1	2	2
1	1	1	2	2	1	2	3	2	1	1	2	2	1	2	2	1	1	2	2	1	1	1	2	1	2	1	1	2	2	2	1	2	2	1	1	2	2	1	2
3	1	1	1	1	2	1	1	2	1	1	1	2	1	1	2	1	3	1	2	1	2	1	1	1	1	1	1	1	1	3	2	2	2	3	3	1	3	2	3
2	1	2	1	1	2	1	1	1	1	1	1	2	1	1	1	1	1	1	1	1	2	1	1	1	1	1	1	2	1	5	2	1	2	1	2	1	2	1	3
1	1	2	1	1	1	1	1	1	1	2	2	2	1	2	2	2	2	1	1	1	2	1	1	1	2	1	2	1	3	1	1	1	1	2	1	1	1	2	1
5	5	3	5	4	2	5	2	2	5	5	3	3	2	2	5	2	3	2	3	3	3	2	3	4	3	3	3	5	4	3	3	4	3	2	1	1	2	2	3
1	1	2	1	1	1	1	1	1	2	1	2	2	2	2	2	2	1	1	2	1	3	5	2	3	2	2	2	3	3	2	1	1	1	2	2	1	1	1	2
5	2	3	5	5	2	3	3	3	4	2	3	2	5	4	2	2	3	2	4	2	5	5	5	4	3	3	3	4	4	3	5	4	5	5	3	4	3	4	3
3	2	2	2	2	1	3	3	2	1	4	4	3	4	3	3	3	3	2	5	4	3	3	3	4	2	5	3	4	4	3	4	3	3	2	3	4	2	3	3
2	1	1	1	1	1	2	1	2	2	3	2	4	2	3	2	3	4	2	3	2	3	2	3	5	2	3	5	3	2	3	3	5	4	2	3	5	4	3	3
1	1	1	1	1	1	1	1	1	2	1	1	2	1	1	1	1	2	1	1	1	1	2	2	2	2	2	1	1	1	1	1	1	2	1	1	1	2	2	3
1	1	1	1	1	1	1	1	1	2	2	1	1	1	2	1	2	2	2	2	2	2	2	1	1	1	1	1	2	2	5	2	2	3	1	1	2	2	2	2
1	1	2	1	1	1	2	1	2	2	1	1	1	1	1	2	1	2	1	1	1	1	1	2	1	1	1	1	2	1	2	1	2	1	1	2	2	3	1	1
2	1	1	1	2	2	2	1	1	2	4	2	1	1	1	2	3	3	2	2	2	2	1	5	1	3	4	4	3	3	3	2	3	3	2	2	2	1	1	3
3	2	3	2	2	2	2	2	3	3	3	2	3	2	4	3	3	2	2	2	1	1	1	1	1	2	1	1	2	3	3	3	3	3	5	3	2	3	2	4
1	1	1	1	1	2	1	2	3	1	1	1	1	1	2	2	1	1	1	1	1	2	1	2	1	1	1	1	1	2	3	3	2	3	2	3	1	1	2	3
1	1	1	1	1	1	1	1	2	1	1	2	1	1	1	1	2	1	1	1	2	1	2	1	1	1	2	2	3	2	1	1	1	2	1	1	1	1	1	1
3	2	3	3	4	5	2	2	3	3	3	3	4	5	3	3	2	5	3	3	5	4	5	3	5	5	4	4	2	5	4	2	3	3	1	3	2	3	2	3
2	2	3	2	2	3	3	2	3	2	3	2	3	4	2	3	3	5	3	1	2	3	2	2	5	3	3	4	3	3	3	2	3	3	1	2	5	3	2	2
1	1	2	1	1	3	1	1	1	1	2	4	2	5	3	3	4	3	3	3	1	4	1	1	1	3	3	3	3	3	3	1	2	2	1	2	1	2	1	2
3	2	1	2	4	2	2	2	2	2	3	5	3	2	5	3	5	3	5	3	5	5	5	5	3	4	5	2	4	5	3	5	4	5	3	5	4	4	5	5
2	2	1	1	1	1	1	1	1	1	1	2	2	1	2	2	1	1	2	2	2	1	1	1	1	1	1	1	3	2	2	1	1	1	1	1	1	1	2	1
3	5	5	5	4	3	4	2	4	3	3	2	2	2	2	2	3	5	2	2	5	2	5	3	2	3	4	3	4	3	1	1	1	1	1	1	1	1	1	2
3	5	2	2	1	2	2	2	2	3	1	3	3	1	2	2	1	1	2	2	1	1	2	2	2	3	1	1	1	1	3	4	3	3	4	5	2	3	3	3
1	1	1	1	2	1	2	1	2	1	1	2	2	1	2	2	1	1	1	1	1	2	2	3	2	2	2	2	3	1	1	1	3	2	1	2	2	3	1	2
3	2	4	3	4	2	3	4	3	5	4	4	5	2	3	3	3	3	4	4	2	3	2	2	2	2	2	2	2	3	4	5	4	3	2	5	2	3	2	3
3	2	3	4	2	1	3	4	3	5	3	2	2	1	2	2	1	3	2	3	2	3	3	2	4	3	3	3	4	3	4	5	4	4	4	4	2	3	2	3
3	2	4	3	3	2	3	3	3	5	3	3	4	2	5	3	5	3	2	4	2	3	2	3	4	5	3	3	5	3	4	2	2	3	1	2	2	2	1	3
1	1	2	1	1	1	1	1	1	1	1	1	2	1	1	1	2	3	1	2	1	1	1	2	1	2	2	1	1	1	3	2	3	3	1	2	2	2	2	1
2	1	1	1	1	1	1	1	1	2	1	1	2	1	1	1	1	2	1	1	2	1	1	2	1	3	1	2	2	3	2	2	2	2	2	2	1	1	2	1
3	2	2	1	2	4	4	3	3	5	3	3	3	4	5	5	3	5	1	5	4	3	2	3	5	3	2	3	3	3	3	4	3	4	2	3	2	3	2	5
2	2	2	2	1	2	2	2	1	1	2	1	3	2	1	2	2	3	1	1	2	3	2	4	4	2	3	2	3	5	2	2	2	2	2	2	2	1	1	3
1	2	2	1	2	1	3	1	2	2	2	1	2	1	1	1	1	2	1	2	1	1	1	1	2	1	1	1	2	2	3	2	1	3	2	2	1	2	2	4
3	1	2	2	2	2	2	1	2	1	1	3	3	2	3	2	1	1	2	3	4	5	2	3	2	3	3	2	5	3	1	3	3	3	2	2	1	3	2	3
3	2	2	3	4	4	3	3	3	4	3	4	2	2	3	3	5	4	1	3	2	2	2	3	2	3	2	2	2	3	3	3	2	3	2	4	2	4	2	5
2	1	1	4	2	2	3	1	2	1	2	2	2	2	2	2	1	3	2	2	4	2	2	3	2	1	2	3	3	1	3	1	1	3	1	1	2	3	2	2
2	2	2	2	2	2	4	1	2	2	3	2	2	2	2	2	5	5	5	3	2	2	2	3	2	5	3	3	5	4	5	2	2	4	2	2	5	3	1	3
3	1	1	3	2	1	3	2	1	2	2	1	2	2	1	1	2	3	2	1	2	4	2	2	3	3	2	2	3	3	3	3	3	3	2	1	4	2	2	3
1	1	1	1	1	2	1	2	2	1	2	2	5	2	4	2	3	3	2	3	2	3	1	3	4	3	3	5	3	3	3	5	3	3	2	5	3	3	2	4
3	2	2	3	2	2	3	1	1	3	1	3	5	2	3	4	2	2	2	3	5	3	2	3	3	4	3	3	3	3	3	2	3	2	2	3	1	5	2	3
3	2	4	3	2	2	2	3	5	3	1	1	1	1	1	1	2	1	1	1	2	5	2	3	4	3	5	5	3	3	5	2	3	3	3	3	5	2	2	2
1	1	2	1	1	2	2	1	2	2	1	1	1	1	2	2	1	1	1	1	3	1	2	3	2	3	2	4	3	2	1	1	1	2	1	2	1	1	1	1
1	1	2	1	2	2	1	1	1	2	1	2	2	2	2	2	2	3	2	3	1	2	2	1	1	2	2	3	1	2	3	3	2	3	1	4	1	3	2	3
2	4	3	3	2	2	3	3	4	3	2	1	3	2	1	2	1	3	2	1	1	2	2	3	2	1	2	3	3	3	3	2	2	3	2	3	2	3	2	3
5	5	3	5	5	3	3	3	4	4	2	4	4	2	3	4	3	3	2	5	1	3	5	5	1	2	3	1	3	3	4	3	3	2	2	3	2	3	3	3
1	1	1	1	1	1	1	1	2	1	4	2	4	1	1	1	2	3	2	2	1	1	2	2	1	1	1	1	3	1	1	2	1	1	1	2	1	2	1	2
2	2	2	1	2	1	1	1	2	1	1	2	1	1	2	2	2	3	1	2	1	1	1	1	1	1	2	1	2	1	3	1	1	1	1	1	1	1	1	1
3	2	2	5	4	4	3	3	3	3	1	2	3	1	2	2	2	3	2	2	1	2	2	2	2	1	1	2	1	3	3	3	4	3	2	3	1	5	2	2
1	1	1	1	1	1	1	1	1	2	1	1	1	1	1	1	1	1	1	1	2	2	2	3	2	3	2	3	3	3	1	1	1	1	1	1	1	1	1	3
2	2	2	3	2	2	4	5	2	2	1	1	3	1	4	2	2	3	2	2	2	4	1	4	2	3	2	3	3	4	3	3	3	3	5	3	4	4	2	3
4	2	2	2	5	2	3	3	4	5	1	4	2	1	3	4	2	2	1	3	5	3	2	3	2	3	4	5	3	3	5	2	4	3	1	3	2	4	1	3
4	2	3	3	2	2	2	3	5	4	2	3	3	2	3	3	2	2	2	2	4	5	5	5	3	3	3	4	5	4	5	2	2	4	2	5	2	5	1	3
2	1	2	1	2	2	2	1	2	1	1	2	1	1	2	2	2	1	2	2	2	2	1	4	2	3	2	2	3	3	1	1	1	2	1	1	1	2	1	3
1	1	2	1	1	2	2	1	2	1	3	2	3	3	3	3	3	3	2	2	1	2	2	1	3	3	2	3	3	2	1	1	2	3	2	2	1	2	1	2
2	2	2	1	2	2	3	3	2	2	2	3	2	1	3	2	1	2	1	3	1	2	3	2	2	3	3	1	3	3	1	1	1	3	1	1	1	1	1	1
1	1	2	2	1	2	1	2	2	3	2	2	3	1	5	3	3	2	3	3	2	1	2	4	2	2	2	3	3	3	3	2	1	1	2	3	2	2	2	3
5	2	3	4	2	2	2	2	3	3	3	2	3	1	1	2	3	4	2	1	2	2	2	2	2	3	4	3	5	3	3	3	3	4	1	2	2	4	2	4
3	2	2	2	2	1	1	1	2	2	2	2	2	2	3	1	3	3	5	3	1	3	1	2	1	2	2	2	3	3	5	3	4	4	1	3	2	3	2	3
2	3	3	3	2	2	1	5	2	1	2	2	4	2	2	3	2	3	1	3	2	3	2	3	3	3	3	1	2	3	1	1	2	1	1	1	1	3	1	1
1	1	1	1	1	1	2	1	2	2	2	2	2	2	2	1	4	2	2	2	2	1	1	2	2	2	1	1	1	3	2	2	1	2	2	2	1	1	1	2
3	2	4	3	5	5	5	2	2	3	2	2	2	2	2	2	2	3	2	3	2	2	3	3	3	2	2	3	3	3	4	5	3	4	1	5	5	2	3	3
1	1	1	1	1	1	1	1	2	1	3	2	1	1	3	3	2	1	1	2	1	1	1	2	1	1	2	3	1	3	2	1	1	2	1	1	1	1	1	2
1	1	2	1	2	2	2	1	2	2	3	2	1	1	4	2	1	1	1	2	2	2	1	1	1	1	2	1	2	2	1	2	1	3	1	1	2	3	2	3
1	2	1	2	1	2	3	2	2	1	4	3	2	4	4	5	3	4	5	3	5	2	2	3	3	3	2	1	3	3	3	2	3	2	2	3	3	4	3	3
2	1	1	1	1	1	1	1	2	1	1	1	1	1	1	2	2	3	2	1	1	2	1	1	1	1	1	1	1	1	1	1	1	2	1	1	1	1	1	1
2	1	1	2	1	2	5	2	2	2	1	1	2	1	2	1	2	2	1	1	1	1	1	1	1	1	1	2	1	1	2	1	2	2	1	2	2	1	1	1
3	2	2	3	1	2	3	1	2	4	1	1	2	1	1	1	1	2	1	1	2	1	1	1	1	2	1	2	1	2	1	1	2	1	1	1	2	2	2	2
5	2	3	4	2	2	2	2	3	1	2	2	2	1	1	1	2	2	2	2	2	2	3	3	1	4	3	3	4	3	4	5	3	5	5	3	3	3	4	5
1	1	2	2	2	2	2	1	2	1	4	5	3	4	4	5	4	4	2	5	1	1	1	1	2	2	2	1	2	1	2	1	1	1	1	3	1	1	2	3
2	1	1	2	1	1	1	1	2	1	1	1	2	1	1	1	1	2	1	1	1	2	1	1	1	2	2	1	1	1	1	2	1	1	1	1	1	1	1	2
1	1	1	1	1	1	1	1	1	1	1	1	1	1	2	1	1	1	1	2	1	1	1	1	1	1	1	2	2	2	2	1	1	2	1	1	2	1	2	1
5	2	4	3	2	2	5	3	5	5	4	4	3	2	3	5	3	5	4	3	5	5	2	4	2	3	3	5	3	3	4	3	3	3	1	2	4	2	2	1
3	2	2	2	2	2	2	3	3	3	2	1	1	1	2	1	1	3	1	3	1	2	2	3	2	1	2	1	1	1	2	1	2	3	1	2	1	2	2	1
1	1	1	1	1	1	1	1	1	1	3	2	1	2	2	3	3	2	1	2	1	1	1	3	1	2	2	2	2	1	2	1	2	2	2	2	2	2	2	3
2	2	3	2	2	2	3	1	2	2	1	2	2	2	2	2	2	1	2	2	2	3	2	3	2	3	2	2	3	1	3	1	2	1	1	2	2	1	2	2
2	1	2	1	2	2	2	1	1	1	1	2	1	1	1	2	1	2	1	2	1	1	1	1	1	1	1	1	2	3	2	1	2	1	1	2	1	2	1	2
2	1	2	1	2	1	2	1	1	1	1	1	3	1	3	1	3	1	1	1	1	3	2	3	2	1	2	1	2	3	3	3	2	3	1	3	1	3	2	2
2	1	2	1	2	2	1	1	2	2	1	1	1	1	1	1	2	2	1	2	1	1	1	2	3	1	1	1	1	1	2	1	2	2	2	2	1	3	1	1
1	1	1	1	2	1	1	1	2	1	1	2	2	1	2	2	1	1	1	2	2	1	1	1	1	1	2	1	3	2	2	2	2	3	2	2	2	2	2	2
1	1	2	2	1	1	2	1	2	2	1	2	1	1	2	2	2	2	1	1	3	3	2	5	3	5	3	2	3	3	1	1	2	3	1	2	1	1	2	3
2	2	1	3	2	2	2	3	2	3	4	3	3	4	4	3	4	5	5	4	2	4	5	3	5	4	2	3	5	3	1	2	1	3	1	1	2	3	1	2
3	2	2	3	3	2	2	2	2	2	2	4	4	4	5	3	3	3	3	5	4	1	2	2	5	3	2	3	5	3	2	3	5	3	2	3	2	3	5	3
2	1	2	1	1	1	1	1	1	1	1	1	1	1	1	1	1	2	1	2	1	3	2	2	1	2	2	2	1	2	2	1	1	1	1	1	2	1	2	1
5	3	3	3	2	2	2	5	5	3	2	2	3	1	3	3	1	2	2	3	2	3	3	5	3	2	3	3	5	5	4	5	4	3	2	3	2	3	5	2
2	1	1	1	1	1	1	1	1	1	2	3	2	1	3	2	3	1	1	2	1	1	1	1	1	2	2	1	3	2	1	1	2	2	1	1	1	1	1	1
3	2	4	3	2	2	3	2	3	3	2	3	2	1	5	2	1	4	2	5	1	2	4	3	3	2	3	2	3	3	2	1	2	3	2	1	1	2	2	2
1	1	2	1	2	2	2	2	4	3	1	1	2	1	1	1	2	1	1	2	4	2	2	2	2	2	1	2	3	3	1	1	1	3	1	1	1	1	2	1
3	2	4	3	2	2	3	4	2	2	4	3	3	2	3	4	3	1	2	3	2	2	2	1	1	2	2	2	1	1	1	1	1	1	1	2	1	1	1	2
2	2	3	1	2	2	3	3	3	3	2	4	4	2	2	3	2	3	2	4	4	3	2	3	4	3	3	4	3	4	3	3	2	3	2	3	3	5	5	3
2	1	2	2	1	3	2	3	2	2	1	2	3	1	2	2	2	3	1	3	2	2	1	1	3	2	2	2	1	3	3	1	2	2	1	4	1	3	1	2
3	2	4	3	2	2	2	5	2	3	2	2	2	1	2	2	2	3	2	3	2	2	3	1	5	3	3	1	3	2	3	3	3	5	3	3	5	3	2	5
4	1	1	1	1	1	2	1	1	2	4	3	3	2	2	2	5	5	2	3	2	3	2	2	4	3	3	3	5	5	2	2	3	3	1	5	2	2	1	3
3	2	2	2	3	5	3	3	2	2	1	1	1	1	1	1	2	2	1	1	1	4	2	1	2	2	1	3	1	2	4	3	3	4	2	3	1	4	2	5
1	1	2	1	1	1	2	1	1	2	3	2	2	1	2	2	1	3	2	2	1	2	1	1	1	2	2	2	3	3	2	1	1	1	1	1	2	1	1	2
1	1	2	3	1	2	2	3	2	2	2	3	2	2	2	3	1	3	1	2	1	2	2	2	1	2	2	1	2	3	3	2	2	3	1	1	1	1	2	3
1	1	2	2	1	1	1	1	1	1	1	1	1	1	1	1	1	1	1	1	1	1	1	2	1	2	1	1	1	1	1	1	1	1	1	2	1	1	1	1
1	1	1	1	1	1	1	1	2	1	1	2	2	1	2	2	1	1	1	1	1	1	1	1	1	1	1	1	2	1	3	1	2	2	2	1	2	1	1	1
1	1	1	1	1	1	2	1	1	1	1	1	1	1	1	1	1	1	1	2	1	2	1	1	3	3	1	2	3	1	2	1	2	2	2	2	1	1	1	2
3	4	5	3	2	5	3	5	3	3	3	2	3	1	2	2	3	3	1	3	2	5	5	5	3	2	5	5	5	5	3	2	2	3	2	3	4	3	2	2
3	2	2	3	2	2	4	3	4	5	3	2	5	2	1	2	3	3	2	2	4	3	2	2	3	3	3	2	3	2	3	3	5	3	5	5	2	3	2	5
3	2	3	3	1	4	4	2	3	3	1	1	2	1	2	1	1	1	1	1	1	3	4	3	2	3	2	3	3	3	3	2	3	3	2	1	2	3	1	3
3	2	2	5	2	4	2	2	2	3	1	1	3	1	1	1	3	3	2	2	2	2	2	3	3	4	3	4	3	4	3	3	4	3	2	5	3	4	2	5
3	5	5	3	5	2	3	5	3	3	2	4	2	1	2	3	2	3	1	4	2	3	3	3	3	3	3	3	3	4	3	3	3	4	2	3	5	4	3	3
1	1	3	1	1	1	1	1	3	1	5	3	3	2	5	3	4	3	2	4	1	2	1	1	1	2	2	1	1	3	3	2	1	1	1	2	2	2	2	3
2	2	2	1	2	2	3	2	2	2	1	2	3	1	2	2	2	1	1	2	1	2	2	2	1	1	1	1	2	1	3	4	5	3	5	3	4	3	2	3
5	2	4	3	2	2	3	5	5	3	3	3	4	2	2	2	2	3	2	2	2	3	2	5	3	3	5	5	4	5	5	5	4	5	5	3	2	3	2	3
3	3	3	3	4	3	5	3	5	3	2	3	2	1	2	3	2	1	1	2	3	3	3	3	4	3	3	3	5	3	3	1	5	2	1	2	3	1	2	5
1	1	2	2	1	2	2	1	1	1	1	3	2	2	3	5	2	3	1	3	1	1	1	1	1	1	1	3	1	1	2	2	2	1	1	2	2	1	1	2
3	1	1	1	1	1	1	1	1	1	3	1	2	1	1	1	1	3	2	2	1	1	2	1	2	1	1	1	1	2	1	3	3	2	2	3	2	2	2	1
2	1	3	3	2	1	2	2	2	3	4	3	5	4	4	4	3	4	5	4	1	2	2	5	1	2	2	3	3	3	3	3	2	3	1	5	2	2	3	5
1	1	2	3	2	1	1	3	2	1	1	1	1	1	1	1	1	2	1	1	1	1	1	1	2	1	2	1	2	1	1	1	2	2	1	1	1	1	1	1
3	2	3	3	2	2	5	3	3	3	1	1	1	1	2	1	2	2	2	2	2	3	2	3	3	3	2	4	5	5	3	5	2	5	2	5	3	2	1	3
1	1	2	2	2	4	2	4	3	3	3	2	3	5	3	3	2	5	1	4	2	3	5	2	4	3	3	3	3	4	3	4	1	5	3	4	1	3	2	3
4	3	3	2	2	5	3	2	4	3	3	2	2	2	1	2	3	3	2	2	1	1	1	1	1	1	1	2	1	1	2	1	1	2	1	1	1	2	1	2
4	5	2	2	2	2	4	3	3	2	3	3	5	2	4	3	3	3	4	4	2	3	2	3	3	3	4	3	3	3	3	2	1	2	1	1	1	2	1	2
1	1	1	1	1	1	1	1	2	1	1	2	1	1	1	1	1	1	1	2	1	2	1	1	1	1	2	1	1	2	2	1	1	2	1	1	1	1	2	1
2	2	3	1	2	1	2	2	2	2	3	3	5	4	2	4	5	3	2	3	2	1	2	3	2	1	3	2	2	3	3	3	3	4	5	4	2	3	2	4
2	2	1	1	2	1	3	1	1	3	1	3	2	2	2	2	1	1	1	2	1	2	2	3	1	2	2	3	3	3	2	2	3	2	2	2	1	3	1	3
3	5	2	5	2	3	4	1	5	5	4	3	5	2	3	2	4	3	2	4	2	3	2	3	3	1	2	4	3	3	4	3	3	3	5	5	2	3	2	4
3	1	2	1	2	2	2	1	1	2	1	2	1	2	2	2	1	1	1	3	3	1	1	2	1	3	2	2	1	3	2	1	1	3	1	1	1	1	2	1
3	2	3	3	5	4	3	3	3	5	4	3	5	2	3	2	3	5	5	5	5	3	2	3	5	3	4	3	3	3	3	5	4	3	1	3	5	4	3	5
2	2	4	2	4	2	3	3	2	5	1	2	2	1	1	1	1	1	1	1	2	3	3	3	3	3	2	2	2	3	2	1	1	2	1	2	2	1	2	3
1	1	2	1	2	1	1	1	1	2	1	2	1	1	1	3	1	1	1	1	2	2	1	1	1	1	2	2	2	1	3	1	1	2	1	2	1	1	1	1
3	4	3	5	5	4	4	3	3	5	4	5	3	4	3	5	4	3	2	3	2	3	2	3	2	4	3	5	3	5	5	3	5	5	4	3	5	3	2	5
2	2	2	1	2	2	1	1	3	2	5	3	3	5	5	3	4	3	4	3	2	2	1	3	3	2	3	2	3	3	1	2	2	3	1	2	1	1	2	1
1	2	2	1	1	2	1	2	2	3	2	5	3	2	4	5	4	2	2	3	1	1	1	2	1	1	2	1	2	1	2	2	1	1	1	2	4	2	2	1
2	1	2	1	1	1	2	1	1	2	1	1	1	1	2	1	1	1	1	2	1	1	1	2	1	1	1	1	1	1	1	1	1	2	3	1	1	1	2	1
2	2	2	1	2	2	3	2	4	3	3	2	4	2	2	2	3	5	3	3	4	3	3	5	3	5	3	2	4	4	5	5	3	3	2	2	2	2	2	3
1	2	2	2	2	1	1	3	2	1	1	1	2	1	1	1	1	2	1	3	2	3	2	3	4	2	2	2	1	3	3	2	2	2	2	2	1	2	2	1
5	4	2	3	4	4	3	5	5	4	3	3	5	3	3	3	5	2	2	3	2	3	2	3	3	3	3	3	3	3	5	3	3	3	2	3	4	3	5	3
5	2	5	3	2	3	4	4	3	5	1	2	3	3	2	5	3	5	2	2	5	3	3	5	3	3	4	5	5	3	5	2	3	5	2	3	5	3	5	3
2	1	2	2	1	2	2	1	2	2	2	2	2	1	1	2	2	1	2	1	1	2	1	1	1	2	1	1	1	1	2	1	1	1	1	1	1	2	1	1
3	2	3	4	4	4	4	3	3	3	3	3	4	3	3	4	3	5	5	4	4	5	2	4	5	5	5	3	4	5	3	1	3	2	2	3	2	1	2	3
3	2	5	3	2	4	1	2	2	2	4	2	3	1	3	2	2	5	1	4	1	1	1	1	1	1	1	1	1	2	2	1	3	2	1	2	1	2	1	1
4	2	3	4	2	2	4	5	3	5	5	5	3	3	3	4	5	3	1	4	2	3	2	4	5	4	4	3	5	4	3	4	3	3	2	2	5	3	2	3
1	2	2	1	1	2	3	1	2	1	1	1	2	1	1	2	1	1	1	1	1	2	1	2	1	1	2	2	2	2	3	2	1	3	1	2	1	1	1	3
3	3	4	5	5	2	4	3	3	5	2	3	3	2	2	3	2	3	2	2	2	3	1	3	1	3	3	4	4	2	2	3	3	3	2	3	5	2	3	3
1	1	1	1	1	1	1	1	1	1	1	3	2	2	3	1	2	2	2	3	1	1	2	1	2	2	2	3	3	1	1	1	2	1	1	3	1	1	1	1
3	2	2	3	2	2	2	3	3	3	3	3	5	2	3	3	3	3	5	4	5	3	1	4	4	3	4	2	2	3	3	3	4	3	2	3	2	5	2	3
4	2	2	1	2	1	2	2	2	3	3	3	4	2	3	3	3	3	2	4	2	1	1	2	2	2	2	3	3	3	2	1	1	2	1	3	2	2	1	3
1	1	1	1	1	1	1	1	1	1	1	1	1	1	1	2	1	1	1	1	1	1	1	1	1	2	1	1	1	2	3	2	1	2	2	2	1	1	2	2
3	4	3	3	4	2	5	3	3	3	1	2	3	3	4	3	3	5	2	4	4	4	2	3	3	3	3	3	2	3	3	4	3	3	2	3	5	5	3	5
3	2	2	3	2	2	2	2	2	3	3	4	2	2	3	3	3	3	2	3	2	3	2	1	2	2	2	1	2	3	3	2	2	3	5	3	2	2	2	3
2	3	3	5	3	2	3	5	3	3	5	3	4	4	4	5	4	5	2	3	2	2	2	3	2	2	2	3	3	3	4	5	3	4	5	3	5	3	2	3
1	1	1	1	2	1	2	1	1	1	1	2	2	1	1	2	2	1	1	2	3	2	3	5	3	2	2	3	2	3	3	5	3	3	5	3	2	3	5	4
5	4	3	5	2	2	5	2	3	5	4	3	3	2	4	3	3	3	2	4	4	3	5	5	5	3	5	3	3	4	4	5	3	3	2	5	2	3	4	3
3	2	2	2	1	5	3	5	2	3	3	3	3	2	3	5	3	3	2	2	1	2	1	2	1	1	2	2	2	3	2	3	4	3	1	1	2	3	3	3
2	4	2	2	2	1	2	2	3	2	1	5	2	1	3	4	2	2	1	3	2	3	2	3	3	3	4	3	4	3	3	2	2	2	2	3	2	2	2	3
3	4	2	5	2	4	3	5	5	5	4	5	4	3	4	3	5	4	4	5	4	3	2	3	5	4	3	3	5	4	3	5	2	4	2	3	1	3	2	3
2	2	2	2	4	2	1	2	2	3	3	2	5	1	3	2	3	3	2	2	2	2	2	5	3	5	3	3	3	3	3	4	4	3	2	2	2	2	2	2
2	2	5	2	2	2	3	5	4	3	4	2	3	2	2	2	3	3	2	2	1	1	1	2	1	2	1	2	2	3	3	2	4	3	1	2	1	3	2	3
2	2	3	3	1	2	3	3	2	2	2	1	1	1	1	1	1	2	1	2	2	1	1	2	2	3	1	2	2	2	3	2	1	1	1	1	1	1	1	1
2	2	3	2	2	2	3	1	2	3	3	4	3	2	4	4	4	3	4	4	2	3	2	2	1	5	2	3	2	3	4	3	2	3	2	3	2	5	2	4
1	1	1	1	1	1	2	1	1	2	1	2	2	1	1	1	2	2	1	1	1	1	1	1	1	1	1	1	2	1	1	1	1	1	1	1	1	1	1	1
2	2	2	1	2	1	3	2	2	2	2	1	2	1	3	2	3	2	1	2	2	2	2	2	2	3	2	3	3	5	3	4	3	3	3	3	5	4	2	5
5	4	3	5	4	2	2	4	2	3	3	4	5	2	5	3	2	2	3	3	2	3	2	5	3	4	4	3	5	3	3	3	3	3	5	5	2	3	2	3
3	2	5	5	2	2	4	5	3	3	5	3	2	4	3	2	3	3	4	4	2	4	2	4	4	3	3	3	3	3	3	5	2	3	5	3	4	3	2	3
3	2	3	3	2	2	2	2	2	3	1	2	1	1	2	1	2	1	1	2	2	2	1	2	2	2	2	2	2	3	2	3	2	3	2	1	1	1	2	2
4	5	4	5	5	5	3	5	3	3	3	5	5	2	3	3	4	3	3	4	3	4	2	3	1	2	2	3	3	2	3	3	4	2	1	3	1	2	2	2
3	2	3	3	2	2	3	1	2	2	3	2	3	2	3	2	4	3	1	2	2	2	2	4	5	2	5	2	3	2	2	1	2	1	1	1	1	1	1	2
2	5	3	5	3	1	5	4	3	5	3	5	3	4	5	4	3	3	2	4	2	2	2	1	2	1	2	2	3	1	4	3	4	3	2	5	2	4	2	5
1	1	2	2	2	1	1	1	3	2	2	1	2	1	3	2	1	2	1	2	2	2	1	2	2	2	1	2	1	2	3	3	3	3	2	3	1	3	2	3
1	1	1	1	1	2	2	1	1	1	1	1	2	1	1	1	1	1	1	1	1	2	1	1	2	1	2	2	1	1	2	2	2	3	2	2	2	3	2	2
5	2	3	3	2	2	3	4	2	3	2	2	2	3	2	2	2	5	2	2	2	2	2	2	3	5	3	5	3	3	4	4	4	3	5	3	2	3	3	3
3	4	3	5	2	4	4	5	4	4	3	4	3	4	2	3	3	4	3	3	2	5	4	3	3	5	5	4	3	5	3	3	3	5	2	5	5	4	3	3
1	1	1	1	1	1	1	1	1	1	1	1	1	1	1	1	2	1	1	1	1	2	1	1	1	1	2	1	1	1	1	1	2	1	1	1	1	1	1	2
5	5	3	3	3	5	4	3	5	3	5	3	2	2	3	5	4	3	2	3	2	4	2	4	3	4	3	5	3	5	3	5	2	5	4	3	2	5	5	5
2	1	2	1	1	1	1	1	1	2	2	1	1	1	3	2	2	2	1	3	1	1	2	1	2	1	2	1	2	2	2	2	1	1	1	1	1	1	1	1
1	1	1	1	2	1	2	2	1	1	2	5	2	2	3	3	3	3	2	4	2	2	2	1	3	1	2	2	2	1	2	1	2	2	1	2	1	1	2	2
1	2	1	1	2	1	2	1	2	1	1	1	1	1	1	1	1	2	1	1	1	1	1	2	2	2	2	2	1	2	1	1	1	1	1	1	1	2	1	1
2	2	2	2	2	4	3	1	3	3	2	3	4	1	3	2	2	1	2	3	3	3	1	2	3	3	5	2	5	3	2	1	1	4	1	2	1	2	2	2
2	1	1	1	1	1	2	1	1	1	1	1	1	1	1	1	2	2	1	1	1	2	1	2	1	1	1	2	1	1	2	1	1	1	1	1	1	2	1	1
4	4	3	2	5	3	3	4	2	5	5	3	5	2	4	4	5	3	3	4	1	3	3	4	4	5	4	2	2	3	3	3	2	2	1	3	2	3	2	5
2	2	2	1	1	1	3	1	2	3	1	2	2	1	3	2	4	2	1	3	1	2	2	2	2	1	1	1	2	3	1	1	1	1	1	1	1	2	1	1
5	3	3	4	5	3	3	5	4	5	2	1	2	1	1	2	2	2	1	2	2	3	2	2	1	3	2	2	3	1	3	1	2	1	1	1	1	2	2	2
1	1	1	2	2	2	2	1	1	2	1	1	1	1	3	2	1	1	1	2	1	2	2	3	1	2	2	1	1	3	1	1	1	1	2	1	1	1	1	2
1	1	2	1	1	2	2	2	2	1	3	3	3	2	3	3	3	5	1	3	2	2	1	2	2	3	1	3	2	3	1	1	1	2	1	1	1	2	2	1
2	1	2	2	1	1	2	1	1	2	1	2	2	1	1	2	1	3	1	3	1	1	2	3	1	1	2	2	3	3	3	2	1	3	2	3	2	2	1	3
2	1	2	3	2	2	1	2	2	2	1	1	1	1	1	1	1	1	1	1	1	2	1	1	2	1	1	1	1	2	2	2	1	1	2	1	1	2	1	2
1	1	1	1	1	1	2	1	1	1	1	2	2	1	2	2	2	2	1	2	2	2	1	2	2	2	2	3	3	3	2	1	1	1	1	1	1	3	1	1
4	2	5	3	4	3	3	3	5	5	3	2	2	2	3	3	3	4	2	2	1	5	2	1	3	1	2	3	3	3	3	4	4	3	2	2	1	3	2	3
1	1	2	1	1	1	1	1	1	1	1	1	1	1	1	2	2	1	1	1	2	2	1	1	2	2	1	1	2	1	2	1	1	2	1	1	1	2	1	1
2	2	3	3	5	1	5	5	4	3	3	3	3	2	2	2	3	3	2	2	2	2	2	2	2	2	2	3	2	2	3	2	4	2	1	3	1	3	2	4
3	1	2	2	2	2	2	1	2	3	3	3	4	3	3	3	4	3	2	2	2	2	4	1	2	5	3	3	4	3	3	2	2	3	1	3	1	2	3	1
4	5	3	2	2	5	3	4	4	3	5	3	2	4	3	4	5	3	3	2	2	3	2	3	2	3	3	3	4	3	3	2	3	3	2	2	2	4	3	2
3	1	2	3	1	1	3	1	2	2	2	1	2	2	1	2	2	5	1	2	1	1	2	2	1	3	2	2	3	3	2	1	1	2	1	2	1	2	3	2
5	5	5	4	2	2	3	3	2	3	1	1	1	1	1	1	2	3	1	2	2	4	2	3	5	5	3	4	3	5	3	3	2	3	2	5	2	4	2	3
3	1	2	2	2	2	3	2	2	3	2	3	5	2	3	3	3	5	5	4	2	3	2	5	4	4	4	5	2	3	3	1	1	1	1	2	1	1	1	2
1	1	3	2	3	2	3	1	1	1	3	3	2	1	3	3	3	3	2	2	1	1	2	2	1	1	1	2	1	2	3	4	4	3	2	3	2	3	2	3
2	2	3	3	2	2	2	2	1	1	3	2	3	3	4	3	5	3	2	2	2	1	2	3	3	4	4	3	3	3	2	3	1	2	1	1	2	2	2	2
5	4	3	3	2	4	5	4	4	3	5	4	3	4	4	3	3	4	5	3	2	3	5	2	5	3	2	3	3	3	3	4	3	3	2	5	3	3	3	5
1	1	1	1	1	1	2	1	1	2	1	1	1	1	1	1	1	1	1	1	1	2	1	1	1	1	1	1	3	1	1	1	1	2	1	2	1	2	1	3
1	1	1	2	1	1	1	1	2	1	3	2	2	2	1	1	2	2	1	2	1	2	2	1	1	1	1	1	2	1	1	1	1	3	1	1	1	2	1	3
4	4	5	5	3	5	3	3	3	4	3	3	5	4	2	3	5	3	2	1	2	3	3	2	3	3	3	5	3	5	4	3	4	4	1	3	3	3	3	3
4	1	2	1	2	2	2	1	2	3	1	1	1	1	1	1	1	1	1	1	3	3	1	3	4	3	3	2	3	3	2	1	2	2	1	1	2	2	1	2
2	1	2	2	1	1	1	1	2	1	1	1	1	1	1	1	1	1	1	1	1	1	1	2	1	1	2	1	2	1	1	2	2	1	1	1	2	1	1	2
2	2	3	5	2	2	3	3	2	3	2	2	1	1	3	2	5	2	1	2	3	5	2	3	2	3	3	2	3	3	3	5	3	2	2	2	2	5	2	3
2	2	2	2	2	2	3	2	2	2	2	3	2	2	4	4	2	5	2	3	2	4	4	5	5	4	4	3	3	3	3	5	4	4	5	4	5	3	5	4
5	2	3	2	2	2	3	3	2	3	1	5	2	2	3	5	3	3	3	3	2	2	1	2	2	3	2	3	2	3	2	3	2	3	1	3	1	2	1	3
3	2	4	3	4	2	3	5	3	3	3	4	3	2	3	3	3	3	3	2	4	5	2	3	3	1	3	5	3	4	3	5	3	3	2	4	2	4	2	3
2	1	2	1	1	2	2	1	1	2	1	1	1	1	2	2	2	3	1	1	2	2	1	1	2	2	1	1	2	3	1	1	1	1	1	1	1	2	2	2
4	2	2	4	2	4	4	2	2	2	1	1	5	1	1	1	2	3	1	1	2	2	2	1	2	3	3	3	3	1	5	5	3	3	2	3	1	4	2	4
2	1	1	1	1	2	1	1	1	1	1	1	2	1	1	2	2	2	1	1	2	4	1	2	1	2	2	1	1	3	1	1	1	1	1	2	1	1	1	1
1	1	2	1	1	1	1	2	2	2	1	1	1	1	1	1	2	2	1	1	1	1	1	1	1	1	1	1	1	1	2	1	2	1	1	1	2	2	1	2
1	2	2	1	1	1	3	2	2	2	3	3	3	2	3	4	5	4	1	4	2	2	2	2	3	2	2	1	2	3	3	4	3	3	5	4	4	3	2	4
3	2	2	5	3	2	2	3	2	3	3	1	2	1	1	1	2	2	1	1	5	5	2	2	3	3	3	5	3	5	3	2	1	2	1	1	1	1	2	3
2	2	3	2	2	4	3	1	3	3	3	5	3	2	2	3	3	3	3	4	2	3	2	2	4	3	2	2	2	2	3	3	2	4	2	3	2	3	3	3
3	2	4	2	3	2	2	5	2	3	4	3	3	2	3	4	3	3	2	3	2	3	2	3	3	2	3	2	3	3	3	2	3	3	5	3	1	1	2	3
3	2	3	2	4	2	1	1	3	3	1	1	1	1	1	2	1	3	1	2	1	1	1	1	1	2	1	1	1	2	2	1	1	2	1	1	1	2	1	1
3	2	3	2	2	2	5	2	2	2	2	3	5	2	4	4	3	5	2	3	3	3	2	3	5	3	2	3	3	3	4	3	3	3	2	4	5	3	2	3
1	2	1	2	2	2	1	2	2	2	3	4	4	3	5	4	5	3	2	4	2	5	3	3	3	2	3	3	5	2	3	3	3	3	2	3	2	3	2	3
1	1	2	1	1	1	2	1	2	1	3	5	5	4	3	5	3	3	2	3	3	2	2	4	5	3	3	3	3	4	4	3	4	5	5	3	5	3	3	3
3	4	4	4	5	4	5	5	2	4	4	3	5	2	3	4	4	3	4	4	2	3	3	3	3	3	3	4	3	4	2	3	3	3	2	2	5	3	2	2
3	1	3	2	1	2	1	2	2	2	1	2	1	1	1	1	1	2	1	2	1	1	2	3	3	2	2	2	3	2	2	1	2	1	1	2	1	2	1	1
1	2	2	3	2	2	4	1	2	3	1	1	1	1	1	1	1	2	1	1	2	2	1	2	1	1	1	1	3	1	2	1	1	1	1	1	1	1	1	2
5	2	4	3	4	4	4	3	5	3	4	2	5	2	3	3	5	3	3	3	1	2	2	3	4	2	2	3	3	4	3	2	5	5	2	3	2	4	2	3
1	1	2	2	1	2	1	2	2	1	4	5	3	4	3	5	3	4	4	4	2	4	4	2	1	2	2	2	3	3	4	5	5	3	5	5	2	5	5	3
1	1	1	1	2	1	2	1	2	1	3	3	1	2	3	3	3	3	1	2	1	2	2	2	2	2	2	2	3	3	1	1	2	2	1	1	1	1	1	1
2	2	2	3	2	1	1	1	3	1	1	2	1	1	2	2	3	2	1	2	2	4	1	1	1	2	2	2	3	2	3	1	2	2	2	3	1	2	3	2
3	2	4	2	2	2	2	3	2	3	3	5	2	2	4	3	2	5	1	5	1	1	1	3	1	1	1	2	1	2	3	3	3	3	2	3	2	2	2	3
5	2	3	3	3	3	2	3	5	3	3	5	4	4	5	4	3	3	3	5	2	2	2	2	4	3	4	2	3	5	5	3	3	3	5	1	5	2	2	4
1	1	1	1	1	1	2	2	2	1	1	3	3	2	2	2	2	3	1	2	1	1	1	1	1	1	1	1	1	1	3	1	2	2	2	1	1	3	1	1
3	2	3	5	5	2	3	5	3	3	3	2	2	2	1	3	1	5	5	2	1	3	2	5	2	3	3	5	4	3	2	2	3	3	1	2	1	3	2	2
2	2	2	3	5	2	3	2	3	2	2	2	2	2	1	2	4	5	2	1	1	2	1	1	1	1	2	1	2	2	5	3	3	3	3	2	5	3	4	2
2	2	3	3	2	2	3	2	4	2	2	2	1	1	2	1	1	1	1	2	5	4	5	3	3	5	4	4	5	3	3	2	3	3	2	3	1	2	3	3
3	3	3	1	2	2	2	2	3	3	3	3	3	2	2	2	3	3	2	3	2	2	2	3	1	3	2	2	4	3	2	3	3	3	2	2	2	3	2	4
1	1	2	1	1	1	1	1	1	1	2	1	2	1	2	3	2	3	1	2	1	1	1	2	1	2	1	1	2	1	1	1	1	2	1	1	2	1	2	1
3	2	2	5	1	2	2	1	2	3	3	1	3	1	2	2	1	3	1	2	1	2	2	2	3	1	2	1	1	3	1	1	2	1	1	1	1	1	2	1
3	3	3	5	2	4	4	3	3	3	4	4	2	4	5	4	4	2	3	3	2	2	2	5	3	3	2	3	2	3	3	3	5	3	4	3	3	4	4	3
2	1	1	3	1	1	3	1	3	1	3	3	4	2	2	4	2	3	1	3	2	3	2	5	2	4	4	3	3	3	3	2	1	2	1	1	2	1	2	3
3	4	3	3	2	3	2	2	3	2	5	3	5	4	5	4	3	5	2	3	2	4	2	3	5	5	5	3	3	4	3	3	3	4	2	2	4	3	4	4
5	5	3	4	4	4	4	5	3	4	3	3	3	2	3	3	3	3	3	2	5	3	2	3	5	5	3	3	4	4	5	3	3	5	3	5	2	3	3	5
5	2	3	4	4	2	3	3	5	3	2	1	1	1	1	2	2	3	1	3	2	3	3	4	4	3	3	4	5	3	3	1	1	1	1	2	1	1	1	1
1	1	1	2	2	2	2	2	2	2	1	2	1	1	2	2	1	1	1	3	2	2	2	2	2	3	3	3	3	3	3	3	3	3	2	3	5	3	4	3
2	1	2	3	1	2	1	2	1	1	1	1	2	1	2	1	2	2	1	1	1	2	1	2	1	1	1	1	2	1	3	2	3	2	1	1	3	3	1	2
3	2	2	1	1	3	2	3	2	3	1	1	1	1	1	1	1	1	1	1	2	3	3	5	2	3	4	3	3	3	2	2	2	2	1	2	2	5	4	3
5	5	4	1	5	2	4	2	2	2	5	4	3	5	2	3	2	5	5	3	2	3	2	1	2	3	3	3	3	5	4	5	3	4	3	5	2	4	2	3
2	1	2	2	1	1	2	2	1	1	3	5	5	2	3	3	3	3	2	3	1	2	1	2	2	2	2	2	3	3	5	3	2	2	2	2	1	3	2	4
2	1	3	1	1	1	2	1	1	2	1	2	2	1	2	2	1	1	1	1	1	1	1	1	1	1	1	1	2	3	3	3	2	3	1	1	2	3	2	3
2	2	2	3	2	2	3	1	1	2	1	1	2	2	1	2	3	5	2	3	2	5	3	3	2	3	3	5	2	3	5	5	5	4	5	4	2	3	2	5
5	5	3	3	2	2	2	5	5	3	2	3	3	2	3	3	3	3	3	3	5	4	2	3	3	3	3	5	3	3	3	5	3	4	2	3	5	3	2	4
2	1	2	1	2	1	3	1	2	2	1	2	3	1	3	2	2	1	1	2	2	3	2	5	5	5	4	4	3	3	2	3	3	1	2	1	2	2	1	5
2	2	2	3	2	2	3	3	1	3	3	4	3	4	3	4	3	3	2	5	2	3	1	2	2	2	2	1	2	3	2	2	1	3	4	2	1	3	2	3
3	2	3	4	2	4	4	2	3	3	2	1	2	1	1	2	2	2	1	2	2	4	2	5	4	4	3	3	4	3	3	5	5	3	4	5	3	4	5	4
1	1	1	1	1	1	1	1	2	1	1	3	3	1	2	2	1	2	2	3	2	2	5	2	1	3	2	3	3	3	2	1	1	2	1	2	1	2	1	2
3	2	3	3	5	2	5	3	5	5	1	2	2	1	2	1	2	1	1	1	2	1	5	2	3	3	2	3	4	3	4	2	4	3	2	2	2	2	2	3
2	2	2	2	3	1	2	2	2	2	1	3	2	1	2	2	2	1	1	2	1	1	1	1	1	1	2	1	1	1	2	1	2	2	1	2	1	2	1	2
1	1	1	1	1	1	1	1	1	1	1	2	2	1	3	3	1	1	1	2	1	1	1	2	1	1	1	1	2	1	2	1	2	3	2	1	1	2	1	3
1	1	1	1	2	1	1	2	1	1	1	1	2	1	1	1	1	1	1	1	1	1	1	1	1	1	2	1	1	1	2	2	3	2	2	2	1	3	2	3
1	1	3	2	1	2	3	2	2	3	2	2	1	1	1	2	1	1	1	2	2	5	2	2	5	3	2	3	5	3	1	1	1	2	1	1	1	1	1	3
3	5	5	5	2	2	2	3	3	3	3	3	3	4	3	4	3	3	2	3	2	2	2	2	3	2	2	2	2	5	2	3	2	2	2	2	1	1	2	2
1	3	2	3	2	3	3	5	3	1	1	2	1	1	1	1	2	1	1	1	2	2	2	1	2	2	2	3	1	3	3	5	4	3	3	5	2	3	3	3
5	1	2	3	2	2	2	2	2	2	3	4	3	5	3	4	3	4	3	3	4	5	2	4	4	3	4	3	5	4	3	5	3	5	5	3	2	4	2	3
3	2	4	3	2	2	3	3	3	3	5	3	2	1	3	2	3	3	2	3	2	3	3	2	3	3	3	2	3	3	2	1	1	2	1	1	1	3	2	3
2	1	1	1	1	1	1	1	1	1	1	2	1	1	2	2	1	1	1	2	1	3	1	2	3	1	2	2	1	5	1	1	2	2	1	1	1	2	1	1
5	2	2	1	2	2	3	5	5	2	4	4	2	4	4	5	3	3	2	4	5	4	2	4	5	3	5	4	5	3	3	2	3	3	2	3	2	3	2	3
3	2	2	5	2	2	3	5	3	3	5	4	5	5	3	3	2	5	3	3	4	3	2	5	5	3	5	4	3	3	3	3	3	3	5	4	1	3	2	5
2	1	2	2	1	2	2	2	2	3	1	3	2	1	2	2	2	2	1	2	1	1	1	2	1	1	1	2	1	2	3	3	2	3	2	2	3	3	2	2
3	2	2	1	1	2	2	1	2	3	1	1	2	1	1	1	2	3	1	1	2	1	1	1	1	1	2	1	1	2	2	1	2	1	5	2	2	2	1	1
3	2	4	2	1	1	1	1	2	2	5	5	3	5	3	4	5	5	2	3	1	3	1	2	3	3	2	2	2	2	2	2	3	2	1	5	2	4	1	2
3	3	3	5	2	5	3	5	2	3	3	3	3	2	3	3	3	3	5	3	2	2	2	4	2	3	5	3	5	4	5	2	3	3	1	2	5	2	2	3
1	1	1	1	2	1	2	2	1	1	1	2	1	1	1	1	1	1	1	2	1	1	1	2	2	2	1	1	2	2	1	2	3	2	2	2	2	3	1	3
3	4	5	3	2	2	2	1	3	3	2	4	2	2	2	4	5	3	2	3	4	5	5	3	4	5	4	3	3	3	3	3	4	3	2	2	1	5	2	2
1	1	2	1	1	1	2	1	2	2	1	1	1	1	2	2	1	3	1	1	1	1	1	1	1	1	1	1	2	1	3	2	3	5	2	3	1	1	2	2
4	4	4	4	5	5	5	4	5	3	1	4	3	3	3	5	5	3	2	5	2	3	5	3	3	4	4	3	3	3	4	3	4	5	5	4	4	3	4	4
3	2	2	4	2	5	4	2	5	3	3	5	4	4	5	5	3	3	3	4	3	5	2	3	3	2	5	3	3	3	3	3	3	5	2	5	3	5	2	3
2	1	2	1	2	2	1	2	1	2	1	1	1	1	2	1	1	2	1	2	1	2	2	3	2	3	3	2	3	3	2	1	1	2	1	1	1	1	2	1
3	5	2	5	4	2	2	5	4	3	4	2	3	2	3	2	3	3	2	3	2	3	2	3	1	3	3	4	3	3	4	3	2	5	3	3	2	5	2	3
3	1	2	1	1	2	1	3	1	2	1	2	1	1	3	3	1	2	2	2	1	3	2	2	1	3	3	2	1	2	3	2	1	1	1	1	2	2	1	3
3	4	3	5	3	2	4	3	2	2	3	3	5	2	3	3	3	3	3	2	2	5	5	3	3	2	4	4	4	5	3	2	3	3	5	2	3	2	2	4
3	3	2	3	2	3	3	3	2	5	2	3	3	2	2	2	4	3	2	3	2	3	2	4	2	5	3	3	3	3	3	1	2	4	3	3	2	3	2	4
4	3	2	3	2	2	2	3	5	3	2	2	3	1	3	2	2	3	2	2	4	4	2	4	3	4	4	5	5	5	4	2	5	4	3	3	3	4	2	3
3	2	2	1	2	2	3	4	3	2	2	2	2	1	1	2	1	3	1	3	3	2	2	3	2	4	2	2	3	3	2	1	1	2	2	2	1	1	1	3
2	4	4	3	4	5	3	5	3	4	2	2	2	3	5	2	3	3	5	3	2	5	4	3	5	3	5	4	3	3	4	3	3	3	3	3	2	5	4	4
1	1	2	1	1	1	1	1	1	1	1	1	1	1	2	2	2	2	2	1	2	3	1	3	3	2	3	2	3	3	5	3	2	3	2	2	1	2	2	3
3	2	1	1	2	2	3	3	2	1	1	2	1	1	1	1	3	3	2	3	5	3	4	3	2	3	4	3	4	4	2	3	2	3	2	2	3	3	3	3
4	2	3	5	4	5	5	4	3	5	3	2	3	1	1	2	1	3	1	1	3	5	5	3	5	4	5	5	4	5	3	3	3	5	2	5	2	5	2	3
1	1	1	2	2	1	3	1	2	3	1	2	1	1	2	2	1	2	1	1	1	1	1	1	1	1	1	1	1	2	2	1	2	1	1	3	2	3	1	3
3	4	3	5	4	4	5	3	2	5	4	5	2	2	4	5	3	3	3	4	1	2	1	2	2	1	1	1	2	2	3	3	3	2	2	2	2	3	2	5
2	1	2	1	1	1	1	1	1	2	2	1	2	1	1	2	1	3	1	1	1	1	2	1	1	1	2	1	1	1	1	1	2	1	1	1	1	1	1	1
3	4	3	5	5	2	4	3	2	5	3	2	2	2	3	3	3	5	5	3	5	5	5	3	2	3	5	2	5	4	3	5	3	5	3	5	5	4	2	3
1	1	1	1	2	1	1	1	1	1	1	2	1	1	2	2	1	1	1	1	1	1	1	1	1	1	1	1	1	1	1	2	2	3	1	1	2	1	1	2
2	2	2	1	1	2	2	1	1	4	4	3	2	2	2	3	2	3	2	3	2	2	3	2	1	2	2	1	3	2	1	2	2	1	2	2	1	1	2	1
3	2	3	3	2	3	3	3	2	4	1	2	2	1	1	1	2	2	1	2	1	1	1	1	1	2	2	3	2	3	1	1	1	1	1	1	1	1	1	1
3	5	3	4	2	5	5	5	4	3	5	4	3	2	3	3	3	3	1	4	1	4	2	1	2	3	2	2	3	3	4	3	2	3	5	5	1	3	3	3
3	2	4	3	4	4	3	5	2	2	5	5	2	4	3	4	4	3	2	4	1	3	1	1	3	2	2	1	2	2	3	2	5	3	2	2	2	3	2	2
1	1	2	1	1	1	2	1	1	1	3	3	5	3	3	3	4	4	3	2	2	2	2	2	2	2	2	3	3	3	1	1	1	2	1	1	1	1	1	1
2	1	3	2	2	2	2	2	5	1	4	3	2	2	3	2	2	3	2	3	2	3	2	4	3	3	2	3	3	4	3	4	4	2	3	5	2	3	3	4
3	2	4	2	3	4	3	4	3	2	3	2	1	1	2	2	3	3	1	2	1	2	2	3	3	2	2	2	1	2	3	3	4	3	2	2	3	3	2	3
2	1	1	2	1	2	1	1	2	3	2	5	3	5	4	3	3	5	2	4	2	2	3	3	3	3	2	4	3	3	2	3	4	3	2	2	2	3	2	3
1	1	1	1	1	1	1	1	1	1	1	2	1	1	1	2	1	2	1	2	1	1	1	2	1	1	1	1	1	1	2	1	1	2	2	2	1	2	1	2
5	2	3	5	2	2	5	5	3	3	2	3	3	2	3	5	2	2	2	2	3	4	3	4	2	5	3	5	5	3	3	2	1	3	4	4	2	4	2	3
3	2	2	2	3	2	1	2	2	2	1	1	1	1	1	1	1	1	1	1	1	2	2	1	1	3	2	2	3	3	2	2	2	2	2	2	1	1	2	3
2	1	2	1	1	1	1	1	2	2	2	3	3	2	2	2	2	3	3	3	2	2	1	1	3	3	2	1	3	3	3	2	2	3	2	3	1	3	2	2
3	5	2	3	3	2	3	5	3	2	1	1	2	2	2	2	4	3	2	1	2	3	4	3	2	3	2	2	5	3	3	2	2	2	1	2	1	2	2	3
1	1	2	1	1	2	3	3	2	2	3	5	3	2	3	3	3	3	3	3	1	3	2	2	1	2	2	2	2	3	3	3	2	3	2	3	2	2	2	3
2	2	4	3	2	2	3	3	2	3	3	4	5	2	4	4	3	4	2	4	2	3	4	4	5	3	4	3	4	3	3	3	2	3	1	2	2	4	3	3
1	1	1	1	1	1	1	1	1	1	1	1	2	1	1	2	1	1	1	2	1	1	1	1	1	2	1	1	1	1	1	1	1	3	1	1	1	2	1	1
3	4	5	2	4	3	3	2	3	4	2	3	2	1	3	2	1	1	2	2	2	2	4	5	5	3	4	3	3	3	3	3	3	3	2	2	2	3	3	3
5	3	3	3	2	3	3	2	4	5	3	4	3	4	5	4	4	5	3	4	5	4	3	5	4	3	4	4	4	5	4	4	5	5	5	5	2	5	2	4
4	2	2	1	2	1	2	1	1	4	2	3	3	3	3	5	3	3	2	3	3	3	2	3	3	3	4	4	5	5	4	3	4	3	2	3	4	3	2	3
2	2	2	2	2	2	3	2	2	5	1	2	2	1	2	2	3	2	1	3	2	1	2	1	2	2	2	1	2	2	3	4	3	5	3	3	1	2	2	3
4	2	3	3	2	4	2	2	3	3	1	1	1	1	2	1	2	1	1	1	2	2	2	2	3	3	3	3	2	3	1	2	1	3	1	1	1	1	1	2
3	2	4	3	4	3	3	5	3	4	3	3	3	4	4	4	4	4	3	3	4	3	2	5	4	3	3	3	2	5	4	3	3	5	2	3	3	3	4	3
1	1	1	1	1	2	1	1	1	2	1	1	2	1	1	2	1	2	1	1	1	1	1	1	1	1	2	1	1	1	2	2	1	2	1	2	1	2	1	2
4	4	3	4	2	4	5	3	4	3	3	2	2	1	2	2	1	5	2	3	2	4	2	2	2	3	3	5	5	3	3	5	5	3	2	4	5	3	2	3
3	4	3	1	3	2	4	3	5	3	2	3	2	2	2	4	2	5	2	3	4	3	3	3	5	4	5	5	3	3	3	3	3	5	2	5	3	5	2	5
4	2	5	1	5	3	2	3	2	2	5	5	5	4	4	4	4	5	2	5	2	5	3	3	5	4	3	4	5	3	1	1	1	2	1	1	1	2	1	1
2	1	2	2	2	1	1	1	2	2	1	1	1	1	1	2	1	3	1	1	2	1	2	1	2	2	2	1	3	3	2	1	1	3	1	2	1	2	1	2
1	1	2	1	2	1	3	1	1	1	1	1	1	1	1	2	1	1	1	2	1	1	1	1	2	1	1	1	1	1	4	3	3	3	2	3	2	3	4	2
2	2	4	2	3	1	2	3	3	2	5	5	4	4	3	5	5	3	5	5	4	4	4	4	3	2	4	3	3	3	5	3	3	4	5	3	2	5	4	3
1	1	2	1	2	2	2	2	2	1	1	1	1	1	1	1	1	2	2	2	1	3	2	2	1	1	1	1	1	2	2	2	2	1	1	2	2	1	2	1
3	2	4	3	2	3	3	2	3	3	4	4	3	2	3	5	3	3	3	5	2	4	2	3	1	3	2	2	3	2	4	3	3	4	5	4	2	5	2	3
4	3	4	5	3	4	5	3	3	5	3	3	5	3	5	3	2	5	3	4	2	5	2	3	5	3	2	3	4	3	5	3	4	5	2	4	2	3	2	5
5	4	3	3	2	2	4	5	2	4	3	3	5	2	4	3	4	3	3	3	5	3	2	4	5	3	4	5	3	3	2	2	2	2	2	3	2	1	1	2
1	1	2	1	2	2	1	2	2	3	3	3	5	2	3	4	3	2	1	3	1	3	1	3	3	3	3	5	2	3	4	3	5	3	2	5	2	2	2	3
4	4	5	4	3	2	3	4	3	3	3	2	3	3	4	3	2	4	2	3	1	2	2	3	3	3	3	3	3	3	3	2	2	3	1	2	1	2	1	1
3	2	3	3	2	5	2	5	2	2	4	3	3	2	5	3	5	3	5	3	2	4	1	3	3	3	3	4	3	3	4	3	2	3	2	4	1	2	1	3
2	2	3	3	2	2	2	2	3	3	3	1	2	2	1	2	4	5	1	3	4	1	2	5	3	3	2	2	3	3	3	3	3	4	3	4	4	3	3	3
2	1	1	1	2	1	2	2	1	1	3	3	2	1	2	3	3	2	1	2	1	1	1	1	1	2	1	2	1	2	5	3	3	3	2	3	1	1	2	3
2	2	1	1	2	1	1	1	2	1	1	2	1	1	2	1	1	2	1	3	2	1	2	1	2	1	3	1	1	1	2	2	1	1	1	2	1	1	2	1
3	2	3	3	2	2	4	2	5	2	3	4	2	2	3	5	3	3	3	2	2	3	2	2	2	5	4	5	3	2	5	4	3	3	3	3	2	3	2	3
5	3	4	4	3	2	3	5	5	3	5	4	5	5	4	4	5	3	2	4	2	3	4	4	3	3	3	2	3	3	3	2	2	2	2	4	2	4	1	5
1	1	2	1	1	1	3	2	2	2	1	1	1	1	1	1	1	1	1	1	1	2	1	2	2	3	2	2	2	3	2	1	1	1	1	1	1	1	1	1
1	1	2	1	2	2	3	1	2	2	1	2	1	1	1	2	2	3	1	2	2	1	2	3	2	1	2	2	2	3	2	2	1	1	1	2	2	3	1	2
2	2	1	2	1	1	1	3	1	1	2	3	3	5	5	3	3	3	4	3	2	1	1	1	2	2	1	1	2	2	1	2	2	2	1	1	2	3	2	2
4	4	2	5	4	3	3	5	5	5	4	3	5	5	4	3	3	5	3	3	3	4	5	5	4	4	4	3	5	3	3	3	3	3	2	5	2	4	5	3
2	2	5	3	2	2	3	5	1	3	3	3	3	2	3	2	2	5	2	3	2	2	1	1	1	3	2	3	2	3	1	2	2	2	2	2	3	3	2	3
2	1	1	1	1	1	3	1	1	2	1	2	2	2	3	2	2	3	2	3	1	2	1	1	1	2	1	2	1	1	1	1	1	2	1	1	1	1	1	1
5	2	5	5	2	2	3	3	5	3	1	1	2	1	2	1	3	3	2	2	1	2	2	2	2	3	2	3	3	3	3	4	5	3	4	5	2	5	2	3
2	1	2	2	2	1	2	1	2	2	2	4	3	2	5	3	2	3	4	3	2	2	2	5	3	5	3	4	3	2	3	3	3	4	1	3	2	4	2	3
2	1	2	2	2	1	1	1	1	1	1	1	1	1	1	2	2	2	2	1	1	1	1	1	1	2	1	1	1	3	1	1	1	2	2	1	1	1	2	3
2	2	3	3	2	2	3	1	1	2	1	5	2	2	5	3	2	1	2	2	2	2	2	3	3	2	2	1	3	2	4	3	2	3	2	2	2	3	2	4
1	2	4	2	2	2	4	2	2	2	3	3	5	1	4	3	3	3	2	2	2	3	1	1	1	1	2	1	3	2	2	3	3	4	5	3	2	3	4	4
1	1	1	1	1	1	1	1	2	1	2	1	1	1	1	2	2	3	2	1	1	3	1	2	1	2	2	2	2	3	2	3	1	3	1	3	1	2	2	1
2	3	3	3	3	2	4	3	3	2	4	3	3	2	3	4	3	3	5	3	1	2	2	1	3	2	2	2	3	2	1	1	1	3	1	2	2	2	2	3
2	2	3	3	1	2	2	2	5	4	1	1	1	1	1	1	1	2	1	1	1	2	1	1	3	3	2	3	3	3	4	2	3	3	2	3	2	2	2	3
3	3	3	3	2	2	5	3	2	5	4	3	3	4	2	3	3	3	2	5	2	2	4	2	2	2	3	3	5	5	3	5	5	3	2	5	3	4	2	5
3	1	2	1	2	1	2	1	1	2	3	5	2	2	5	3	4	3	3	5	4	3	2	3	3	3	2	3	4	3	3	4	5	5	2	5	4	5	2	3
3	5	3	3	2	3	3	3	2	3	3	5	4	4	4	4	2	2	3	3	2	1	2	3	3	2	4	4	3	3	2	2	2	3	2	1	1	4	1	3
3	2	2	1	4	2	2	2	3	4	2	2	2	1	1	2	1	1	1	1	5	3	2	3	4	3	3	2	3	3	3	3	5	3	2	2	2	2	2	3
1	1	2	1	1	1	1	1	1	1	1	1	1	1	1	2	1	1	1	1	1	1	1	1	1	1	1	1	1	1	1	1	2	1	1	1	1	1	1	1
2	2	2	1	2	2	1	1	1	2	1	4	3	2	3	3	2	5	3	3	1	2	2	3	3	3	3	1	2	3	4	5	3	5	2	2	2	4	5	3
2	1	2	1	1	1	1	1	1	1	1	1	2	1	1	1	2	2	1	2	1	1	1	1	1	2	1	2	1	1	1	1	2	2	1	2	1	2	1	1
3	2	3	3	2	1	1	1	3	4	4	3	4	5	3	3	3	4	2	3	1	3	1	1	2	2	2	1	1	3	2	1	2	2	1	2	1	1	2	3
1	1	1	1	1	1	1	1	1	1	1	1	2	1	2	2	3	2	1	2	1	1	2	1	2	1	1	3	2	1	2	1	1	2	1	1	1	1	1	1
3	2	5	3	2	4	3	5	2	4	3	3	5	2	4	3	3	3	3	4	2	4	2	4	4	4	3	3	4	4	3	5	3	3	2	2	2	5	2	3
1	1	2	1	1	1	2	1	2	2	1	1	1	1	2	1	2	2	1	3	1	1	2	1	1	1	2	2	2	2	2	1	1	1	1	2	1	1	2	2
2	1	1	1	1	1	1	1	1	2	2	3	3	2	3	3	5	3	3	3	1	2	2	3	4	2	2	1	2	2	2	1	2	2	1	1	1	1	1	1
4	3	3	3	5	2	5	3	3	3	3	3	4	4	3	4	3	5	3	5	2	3	2	2	3	4	4	1	3	3	3	2	1	3	3	3	2	3	2	3
3	2	2	2	1	1	2	3	1	3	1	2	2	1	2	2	3	3	1	3	1	1	1	1	2	1	1	1	1	1	1	2	1	3	1	1	1	2	1	3
2	2	2	1	2	2	2	1	3	2	1	1	1	1	2	1	1	1	1	1	1	1	1	2	2	1	1	3	1	2	2	1	1	2	1	2	1	1	2	1
1	2	2	1	2	2	3	3	1	2	1	2	5	1	2	3	3	3	1	1	2	3	3	2	3	3	2	2	4	5	3	2	2	3	1	1	2	3	2	2
2	2	3	1	2	2	1	3	2	2	1	1	2	1	2	1	1	2	1	1	1	1	2	2	1	1	1	3	3	2	3	4	2	2	2	5	1	1	2	3
1	1	1	1	1	2	1	1	1	2	1	1	2	1	1	2	1	1	1	1	2	3	2	5	3	3	4	3	3	3	3	2	2	3	2	1	2	1	1	3
1	2	4	1	2	2	2	5	2	4	3	4	3	2	3	4	3	1	2	3	2	3	3	2	5	3	2	2	3	2	4	4	3	3	2	3	2	5	5	3
3	1	2	1	2	1	1	1	1	2	1	1	1	1	1	2	1	1	1	1	1	1	1	1	1	2	1	1	2	1	1	1	2	2	1	1	2	2	1	1
3	2	3	4	3	2	2	3	3	3	1	1	1	1	1	1	1	3	1	1	2	2	1	1	2	2	2	2	2	2	2	2	2	3	1	2	1	2	2	4
3	2	2	2	2	1	2	2	2	2	3	3	2	3	2	3	3	3	3	2	2	2	2	2	3	2	2	1	2	3	3	1	3	2	5	2	3	3	3	4
1	1	1	2	2	1	3	2	1	2	3	2	4	1	3	3	2	4	1	3	4	5	2	3	5	3	3	4	3	4	3	3	3	3	2	3	2	3	2	3
2	1	1	2	1	2	2	2	2	2	1	2	2	2	1	1	2	2	1	2	1	3	1	2	1	2	2	2	3	2	3	2	2	3	1	2	1	2	2	3
5	2	2	5	2	2	4	3	3	2	1	1	1	1	1	1	1	1	1	1	5	5	3	3	5	5	3	5	3	4	4	3	3	3	5	4	4	4	2	3
3	1	1	2	2	1	3	2	2	1	1	3	2	1	2	2	1	1	2	2	2	3	2	2	2	3	3	3	1	3	2	1	1	1	1	1	1	2	2	1
3	2	2	2	4	2	1	3	1	2	1	1	2	1	1	2	2	3	1	2	2	2	2	3	2	3	3	2	3	4	2	1	1	1	1	2	1	2	1	2
1	1	2	1	2	1	1	1	2	2	1	3	2	1	1	2	1	1	1	2	1	1	1	1	1	1	1	1	1	2	1	1	1	1	1	1	1	2	1	2
1	2	2	1	1	2	1	2	2	2	2	1	2	1	2	1	1	1	1	1	2	2	1	1	2	1	2	1	2	2	2	1	2	1	1	1	1	1	1	1
1	1	1	1	1	1	3	2	1	2	1	1	1	1	2	1	1	1	1	1	1	1	2	1	1	2	2	2	1	1	2	1	1	1	1	1	1	1	2	1
1	2	2	1	2	2	2	1	2	1	1	1	1	1	1	2	1	1	1	1	1	1	1	1	1	1	1	1	1	1	2	2	3	2	2	2	2	1	1	3
2	2	2	3	2	1	2	3	2	2	1	2	1	1	2	2	1	1	1	1	1	1	1	1	1	1	1	1	2	1	2	1	1	1	1	1	1	1	1	2
1	1	2	4	1	1	1	1	2	2	5	3	2	2	3	3	3	3	2	3	2	2	2	3	3	3	4	2	3	3	3	2	3	2	3	1	2	4	2	3
1	1	2	2	1	3	3	3	2	2	3	1	2	1	2	2	3	3	2	2	1	1	2	2	2	3	3	1	3	5	4	2	2	1	1	2	1	1	2	1
2	2	2	2	2	2	2	1	2	2	1	1	1	1	1	1	1	1	1	1	1	3	1	1	2	2	1	1	2	2	2	1	1	1	1	1	1	1	1	2
3	4	5	4	4	2	4	3	3	5	3	4	3	4	3	3	2	3	1	3	5	5	3	3	3	4	3	3	3	3	3	3	2	3	2	3	4	2	2	3
1	2	2	2	1	2	4	2	2	4	1	2	1	1	1	3	1	1	2	1	1	2	2	1	1	2	2	2	2	2	3	3	2	5	5	3	1	2	2	3
1	1	2	3	2	2	3	3	3	2	3	2	3	2	2	2	3	2	2	2	3	2	2	2	3	3	3	3	4	3	4	3	2	2	2	1	2	1	1	3
2	2	2	3	2	2	3	3	2	2	4	3	2	2	4	3	2	1	2	2	2	3	2	3	2	5	3	3	3	3	1	1	2	1	1	2	1	1	1	2
5	3	3	3	2	2	2	3	3	3	3	4	4	2	4	4	4	3	4	4	2	3	1	1	1	1	2	1	3	3	5	4	5	3	5	5	2	5	2	5
2	2	2	2	1	2	4	5	5	2	2	2	2	1	1	2	1	3	1	2	2	1	1	2	2	2	2	3	2	2	4	3	3	5	2	3	3	2	3	4
2	1	2	1	2	1	3	2	3	3	2	1	2	2	2	2	2	2	2	1	2	1	1	1	1	2	1	2	1	2	2	1	2	1	1	3	1	3	2	2
1	1	2	1	1	2	1	1	1	1	1	2	1	1	2	2	3	2	1	2	1	1	1	1	1	1	1	1	2	1	2	1	1	2	1	1	1	1	1	2
4	3	3	3	5	3	3	3	3	3	1	1	1	1	1	1	1	4	1	1	3	3	2	2	3	2	3	2	3	5	2	3	3	3	2	2	3	2	1	3
2	1	1	2	1	1	2	1	1	1	3	2	2	1	2	2	2	2	1	3	1	1	1	1	2	1	1	1	1	3	2	1	1	2	1	1	1	1	1	3
3	2	1	1	2	2	2	2	1	2	1	2	1	1	3	2	2	1	1	2	1	3	5	2	2	3	3	2	3	3	3	3	3	3	2	3	2	2	1	3
1	2	2	1	2	2	1	2	1	2	1	1	1	1	2	2	1	1	1	1	1	1	2	2	2	1	2	1	1	1	3	3	2	3	1	3	2	5	3	3
5	3	2	1	2	4	3	4	5	1	3	3	1	1	3	2	2	3	2	3	2	1	2	2	3	2	2	2	3	3	4	4	3	3	2	5	5	4	2	4
3	4	4	5	1	4	3	3	3	5	2	2	2	2	1	1	1	3	2	1	2	3	2	3	3	5	3	4	3	4	1	1	1	2	1	1	1	1	2	2
1	2	2	1	2	1	3	2	1	3	3	2	2	2	1	3	3	3	2	2	1	1	1	2	3	2	2	2	1	1	2	1	2	3	1	1	1	2	1	2
1	1	1	1	2	1	1	1	1	1	1	2	1	1	1	1	1	2	1	2	1	2	1	2	3	2	1	2	2	3	1	1	2	1	1	1	2	1	1	3
1	1	1	1	2	1	1	1	2	1	1	1	2	1	2	1	2	1	1	1	1	1	1	2	2	1	2	1	1	3	1	1	1	1	1	1	2	2	1	3
5	2	2	2	2	4	1	5	3	3	1	3	2	2	4	2	2	1	2	4	1	2	2	5	4	3	3	3	4	3	5	5	3	3	2	3	2	2	5	5
3	1	2	1	1	2	1	1	1	1	3	3	3	2	2	2	3	4	3	4	2	3	1	4	1	2	3	4	2	3	2	1	2	2	2	2	1	1	1	3
3	2	4	2	2	4	3	1	5	3	3	4	4	4	2	4	5	3	3	3	2	5	2	3	3	2	3	5	3	3	3	2	5	5	3	2	2	3	3	3
2	2	2	2	2	2	2	1	2	3	1	3	2	2	2	2	4	2	1	3	2	3	4	5	3	3	4	2	3	3	3	3	3	4	2	2	2	5	2	2
2	2	2	2	2	2	1	4	4	3	2	2	2	4	2	2	3	5	2	3	2	2	1	1	2	3	2	2	2	2	4	4	2	3	3	4	2	4	3	5
3	4	2	3	1	2	4	2	4	5	1	1	2	2	1	1	2	2	1	1	2	2	2	2	1	1	2	3	2	1	2	2	2	2	1	2	1	4	2	3
1	1	3	1	1	1	2	2	2	1	3	1	2	2	1	2	2	2	1	2	1	2	1	2	1	1	1	2	3	2	1	1	1	1	1	1	1	2	1	2
1	1	2	1	1	2	1	1	2	1	2	2	2	1	2	3	1	1	1	2	1	1	1	2	1	1	2	1	1	2	1	1	1	1	1	1	1	1	1	1
2	2	2	2	1	1	2	1	2	1	1	3	2	1	2	3	1	2	1	3	1	2	1	2	1	2	2	1	2	2	2	1	2	3	2	2	2	1	1	3
2	1	2	2	1	1	1	1	2	1	3	2	3	1	2	2	2	4	2	3	1	3	2	4	2	2	3	2	3	2	2	1	2	1	1	2	1	1	1	1
2	2	3	1	2	1	3	3	3	3	1	1	2	1	2	1	3	2	1	2	2	5	1	4	4	3	3	4	3	3	2	1	2	2	2	2	2	2	1	1
3	2	2	2	1	2	2	2	1	2	2	2	2	2	1	2	1	3	2	3	2	3	2	3	4	3	4	2	3	5	1	1	1	1	1	1	1	1	1	3
2	1	3	1	1	1	4	1	2	4	1	2	2	1	2	2	3	3	1	2	1	2	1	1	2	1	1	1	1	2	1	1	2	1	2	1	1	1	1	1
2	1	1	2	1	2	2	1	2	1	3	2	3	2	3	3	1	4	2	2	1	1	1	2	1	1	1	2	1	3	3	3	3	4	5	5	3	2	2	3
2	2	5	2	2	2	2	3	3	3	2	3	3	2	3	3	3	2	2	3	2	3	2	3	5	2	3	1	3	3	3	5	4	4	2	3	2	3	4	3
3	1	2	2	2	2	1	1	3	2	1	1	2	1	1	1	1	2	1	3	2	2	2	3	2	3	2	5	2	3	4	1	1	3	2	1	1	4	2	2
2	1	2	3	2	1	1	3	2	2	2	3	3	2	2	1	2	2	2	2	2	2	5	2	2	2	4	2	3	3	3	2	2	3	1	1	2	2	2	3
3	1	3	2	2	1	2	2	3	2	1	1	2	1	1	1	1	3	1	2	1	2	1	2	2	2	2	1	3	2	1	1	2	1	1	2	1	2	1	2
2	2	3	2	2	2	2	2	3	2	2	3	2	2	3	4	3	3	2	3	1	2	2	2	1	2	2	1	2	3	4	3	3	3	4	3	2	3	2	3
1	1	2	1	1	2	2	2	1	3	3	3	2	2	3	3	3	2	2	2	1	1	1	2	1	1	2	1	1	2	2	1	1	1	1	1	1	2	1	2
3	2	2	3	2	2	3	3	2	2	5	3	3	2	2	2	4	3	2	3	1	2	2	2	3	2	2	2	2	3	1	2	2	2	1	2	1	2	2	2
2	2	3	2	2	2	3	4	3	5	5	3	5	3	5	3	5	3	4	3	2	3	3	3	5	4	4	3	3	5	3	2	1	3	1	2	1	3	1	3
3	3	5	5	2	4	5	2	3	3	1	1	1	1	2	1	1	2	1	1	1	1	1	3	1	2	2	1	2	2	3	3	1	2	1	1	1	1	1	2
3	2	3	1	1	1	1	3	1	2	3	5	3	2	5	4	4	3	2	4	2	5	5	4	5	4	5	5	5	3	5	3	4	3	5	3	2	3	2	5
1	3	2	2	3	2	5	3	2	3	2	2	2	2	3	2	3	1	1	2	3	3	2	2	1	3	3	2	3	3	4	2	2	3	2	3	2	3	2	3
4	3	5	4	5	2	3	3	3	5	3	3	5	4	4	4	2	3	1	3	2	3	2	5	3	2	2	3	3	2	1	2	5	2	1	1	3	3	2	3
2	2	3	1	2	4	3	3	2	3	1	2	2	2	1	2	2	3	1	1	2	3	2	2	2	3	3	2	3	1	3	2	3	1	2	2	2	2	1	2
1	1	1	1	1	2	1	1	1	1	4	2	2	1	1	2	2	3	2	1	1	1	1	2	1	2	1	1	2	1	3	2	3	3	1	3	1	3	1	3
1	2	2	2	2	2	3	5	3	2	1	2	3	1	2	2	2	2	1	2	2	2	2	3	1	1	2	3	3	3	4	4	3	5	2	2	3	4	5	4
1	1	1	1	1	1	1	1	1	1	1	2	2	1	2	2	1	1	1	2	5	2	2	3	3	3	2	3	3	3	1	1	3	2	1	1	1	1	2	2
2	2	3	1	1	2	2	1	3	2	2	1	1	1	2	2	3	1	1	2	2	3	2	2	2	3	2	1	1	2	2	1	1	1	1	1	1	2	1	1
1	1	2	2	1	1	2	1	1	1	3	3	2	1	3	3	1	1	2	2	3	3	3	5	3	5	3	5	5	5	1	2	1	2	1	3	1	1	2	3
5	4	4	3	2	2	4	3	4	5	1	3	1	1	1	1	2	1	1	2	5	2	4	2	1	3	3	3	3	3	3	2	3	3	1	2	2	2	4	1
3	2	5	3	3	2	4	3	2	2	3	4	3	3	3	3	2	3	2	3	1	1	2	1	1	1	3	1	1	3	1	1	2	3	2	2	1	1	1	3
1	1	1	1	1	1	1	1	1	1	4	3	2	2	3	4	3	2	1	3	2	4	3	5	3	4	4	4	4	3	5	5	3	3	2	3	5	5	4	3
2	1	1	1	1	1	1	1	1	1	2	1	3	2	2	2	3	3	2	3	2	2	1	3	1	3	2	1	3	2	2	1	2	2	1	3	2	1	2	2
2	1	3	1	2	2	1	1	1	1	1	1	1	1	1	2	1	1	1	1	2	3	1	3	2	2	3	2	5	3	2	1	2	2	1	1	1	1	2	1
3	1	2	1	2	1	2	2	2	2	2	1	2	1	2	1	2	1	2	1	1	1	1	2	1	1	1	1	1	1	1	2	1	1	1	1	1	2	1	1
2	1	2	2	2	1	1	1	2	2	1	1	1	1	1	1	1	1	1	2	1	2	1	2	1	3	1	2	3	1	1	1	1	2	1	1	1	1	2	2
3	1	2	1	2	1	4	1	2	2	2	2	2	2	4	3	2	5	2	3	2	2	2	2	2	2	3	4	3	2	1	1	1	3	1	1	1	2	1	2
4	2	2	3	2	4	3	1	3	2	2	3	3	4	2	2	3	3	2	3	2	2	2	3	2	3	2	1	3	1	3	1	2	2	1	1	1	3	2	2
1	2	2	2	2	1	3	3	3	2	4	3	2	4	2	3	3	3	2	2	1	1	2	1	1	2	1	2	1	2	3	3	3	3	2	3	1	1	2	2
3	4	3	2	2	1	3	2	3	3	3	2	5	2	3	2	2	3	3	2	4	2	2	3	4	3	4	3	3	3	3	3	2	5	2	3	3	4	2	3
3	2	2	1	1	2	2	1	2	3	2	1	1	1	1	1	1	3	1	1	2	2	1	1	3	2	2	3	3	3	3	1	1	1	1	1	1	2	2	2
2	2	2	1	1	2	2	2	1	2	2	1	1	1	1	2	2	4	2	2	2	4	4	3	2	3	5	3	3	3	4	3	2	3	3	4	3	3	2	4
1	1	1	1	2	1	1	1	1	3	1	3	2	2	1	2	3	1	1	2	1	1	1	1	1	1	1	1	3	1	2	1	2	1	1	1	1	2	1	1
2	2	2	1	2	1	2	2	1	1	3	3	3	2	3	5	3	5	2	3	1	1	1	2	2	1	1	2	2	2	2	2	2	2	2	1	2	3	2	3
1	1	1	1	1	1	1	2	1	1	1	3	3	2	5	3	4	3	2	5	1	1	1	1	1	1	1	1	1	1	1	1	2	1	1	3	1	3	2	1
2	2	5	3	2	4	3	2	2	3	1	1	2	1	2	3	1	2	1	1	5	3	3	4	5	5	5	4	5	4	3	1	2	1	2	1	1	1	1	3
1	1	2	1	1	1	1	1	1	2	1	3	3	2	2	4	1	2	2	3	2	1	1	2	1	2	2	1	3	4	1	1	2	2	1	2	1	1	1	1
2	1	1	2	1	1	2	1	1	1	2	4	1	1	4	3	3	1	2	3	2	1	2	3	3	2	2	1	3	3	2	1	2	2	1	1	1	1	1	2
3	3	3	2	2	2	3	3	3	5	2	2	3	3	2	2	3	4	3	3	2	1	1	2	1	1	1	1	2	1	2	2	2	3	2	3	2	3	2	2
2	1	2	3	1	1	2	2	1	1	1	2	1	1	2	2	1	2	1	3	1	1	1	3	1	1	1	1	1	1	3	2	1	2	2	2	3	2	1	3
5	2	2	5	4	2	3	5	3	3	2	4	3	2	2	2	2	3	1	3	2	4	3	3	2	3	5	3	2	3	2	2	3	5	2	3	2	2	2	3
4	2	2	1	2	2	3	3	1	3	3	3	2	2	2	3	5	3	1	2	1	1	2	1	1	1	1	1	2	1	2	3	3	1	1	2	2	3	2	4
2	1	2	1	1	1	2	2	1	3	2	2	1	1	1	1	1	1	1	2	2	3	2	3	3	3	3	5	3	3	2	1	1	1	1	2	1	1	1	1
3	2	2	2	2	4	3	2	3	1	3	3	2	2	3	2	5	2	2	2	2	2	1	2	2	2	2	2	2	1	3	5	4	3	5	3	2	4	2	4
3	3	2	3	2	2	2	4	3	5	1	1	1	1	1	1	1	2	1	1	1	2	2	3	2	2	2	2	2	2	3	3	3	4	3	3	1	3	2	1
4	4	4	3	2	2	3	5	4	3	2	2	2	2	1	2	3	3	2	2	4	3	2	2	1	2	2	2	3	1	1	1	1	2	1	2	1	1	1	1
1	2	2	1	2	2	1	3	1	2	2	2	2	1	1	1	1	2	1	1	2	1	1	1	2	2	1	2	1	2	1	1	2	2	1	2	1	2	2	2
1	1	2	1	1	1	1	1	1	1	1	1	1	1	1	1	1	2	1	1	1	1	1	1	1	1	1	2	1	1	3	3	2	2	1	2	1	2	2	2
1	1	2	1	3	2	1	1	2	2	2	1	2	2	2	2	1	2	1	1	2	2	2	3	2	4	2	4	3	2	2	2	3	3	1	3	1	3	2	2
4	5	3	3	4	2	3	4	5	5	4	3	3	4	5	4	3	4	4	2	1	1	1	1	2	1	2	1	1	1	3	2	3	3	1	3	2	1	1	5
3	5	4	4	2	3	3	1	4	3	3	3	3	2	3	5	2	3	2	3	2	3	1	3	2	2	2	1	3	2	2	1	1	1	2	1	1	2	2	1
4	4	2	3	1	2	2	5	2	5	2	3	3	2	3	3	3	2	2	2	1	2	2	2	3	1	2	2	2	2	4	2	2	1	2	1	1	2	2	3
2	2	2	2	2	2	3	3	2	2	1	2	1	1	2	1	1	2	1	1	1	2	2	3	1	3	2	2	3	2	1	3	2	1	2	3	2	2	5	3
3	1	3	5	2	4	4	2	3	3	1	3	1	2	2	3	4	2	2	2	1	4	1	1	3	3	2	3	3	3	3	3	3	4	2	3	2	2	2	1
2	2	3	2	1	2	3	3	3	3	1	1	1	1	1	2	1	2	1	1	1	1	1	1	1	1	1	2	2	2	1	1	1	1	1	1	1	1	2	1
2	1	2	2	1	2	2	2	3	2	1	3	1	1	1	2	1	1	1	3	2	2	1	2	2	2	2	2	3	2	1	1	2	2	1	1	1	1	1	1
1	1	2	2	1	1	3	1	1	2	1	2	1	1	1	1	3	2	1	2	1	1	1	2	1	2	2	2	1	2	2	1	2	2	1	1	1	2	1	1
1	2	1	1	1	1	2	2	2	2	4	3	2	2	3	2	2	3	3	4	2	3	2	5	5	5	4	5	3	3	3	2	2	1	1	2	1	4	1	3
3	5	3	3	4	2	1	3	3	3	1	1	3	1	1	1	2	2	1	2	2	3	2	3	3	5	5	3	4	5	3	2	3	2	2	2	2	3	2	2
3	1	2	1	2	2	1	2	2	2	1	2	2	1	3	3	1	2	1	2	1	1	1	1	1	2	2	1	2	1	2	1	3	2	1	2	2	2	2	2
3	2	3	2	2	2	3	3	4	3	1	2	2	1	3	2	2	2	1	2	3	4	1	2	3	3	2	3	3	3	3	2	3	1	1	1	2	2	1	3
2	1	3	1	1	2	2	2	3	2	5	4	3	3	5	3	5	3	2	4	1	3	1	1	1	1	2	2	3	3	3	5	5	4	4	4	2	3	3	3
5	2	3	2	4	2	5	3	3	4	2	2	2	2	1	2	3	3	2	2	2	2	2	2	1	2	2	1	1	3	3	2	2	3	1	1	2	2	2	2
3	2	2	1	1	4	2	1	2	3	1	1	1	1	1	1	1	1	1	1	4	2	2	2	2	3	3	2	2	3	1	1	2	1	1	1	1	3	1	2
3	2	2	2	2	2	3	1	5	1	3	2	2	2	2	2	5	4	3	2	4	2	2	3	1	3	2	3	3	3	3	5	5	3	5	2	1	2	4	5
1	1	2	2	1	1	2	1	2	2	1	2	1	1	2	2	1	1	1	2	1	1	1	2	1	2	1	1	2	2	3	2	1	1	1	1	1	2	1	2
3	2	4	3	2	2	3	3	4	3	1	3	3	2	5	3	3	2	1	3	2	2	2	3	5	4	5	3	4	5	3	3	3	2	2	2	2	3	2	3
2	1	2	1	2	2	3	1	3	1	1	2	1	1	2	1	3	3	2	1	5	4	2	5	2	2	2	1	4	5	3	3	5	2	2	2	2	3	5	3
1	1	1	1	2	2	2	1	2	1	1	2	2	2	2	2	3	3	2	2	4	4	2	3	3	3	5	3	5	3	3	2	2	3	1	2	4	3	2	3
2	1	2	1	1	1	1	1	1	1	1	1	1	1	2	1	1	2	1	2	1	1	1	1	1	1	1	1	1	2	2	1	1	2	1	1	1	1	1	2
1	1	1	1	2	2	1	2	2	1	1	2	1	1	1	1	3	1	1	2	2	2	2	2	2	2	1	2	2	2	3	3	1	2	1	2	1	2	5	1
1	1	1	1	1	1	1	1	1	1	1	2	2	1	1	2	2	2	1	1	1	1	1	1	1	1	1	1	3	2	3	4	5	3	2	2	2	3	3	4
5	5	4	5	5	4	5	5	4	5	4	4	5	2	4	2	3	3	2	3	2	3	4	2	3	5	3	3	3	5	5	3	4	3	5	2	5	5	2	3
1	1	2	1	2	1	2	2	1	1	1	2	2	1	1	2	2	1	1	2	1	1	2	1	1	2	2	1	3	3	2	2	2	1	1	2	1	2	1	2
1	2	1	1	2	1	1	1	1	2	1	1	2	1	1	1	2	2	1	2	1	2	2	3	1	2	3	4	3	1	1	1	2	1	1	2	1	2	1	1
3	2	2	1	2	1	2	2	2	2	1	2	5	2	3	2	2	2	1	2	2	3	2	1	2	2	1	1	3	3	4	2	2	3	2	3	3	3	2	4
2	2	2	4	2	4	3	4	3	2	3	1	3	2	3	2	3	5	2	3	3	2	4	4	3	3	4	5	3	3	3	3	4	3	1	3	3	3	2	4
1	1	2	1	1	1	1	1	3	1	1	1	1	1	2	2	1	1	1	1	1	3	1	4	2	2	3	2	4	3	2	2	2	3	1	1	1	2	1	3
2	1	2	2	2	1	2	5	2	3	1	3	1	1	2	2	2	2	1	2	1	2	2	2	3	3	3	3	3	2	3	2	2	2	1	2	1	1	1	2
2	2	4	3	2	2	3	2	4	2	1	3	2	2	3	2	3	2	2	3	1	1	1	1	1	1	1	1	1	2	1	2	1	2	1	1	3	2	2	2
1	1	2	2	2	1	1	2	2	2	1	1	2	1	2	2	2	2	1	1	1	2	1	2	2	1	1	1	3	1	3	3	3	4	2	3	5	3	3	5
5	2	4	5	2	2	3	4	3	4	3	3	2	1	3	2	3	3	1	3	4	3	2	3	5	5	4	4	3	3	3	1	2	3	2	3	1	3	2	1
2	1	1	2	2	1	1	1	2	2	1	2	1	1	2	3	2	4	2	2	2	1	1	2	1	1	1	1	2	1	3	2	2	4	1	2	1	2	1	1
2	2	2	1	2	2	3	2	2	1	2	1	4	1	1	1	3	3	1	1	1	3	2	2	1	2	2	1	2	2	2	1	1	2	2	2	1	2	1	2
4	2	4	3	1	2	2	3	5	2	2	2	2	1	3	2	1	2	2	2	2	1	2	2	2	3	2	2	3	1	2	2	2	2	1	2	1	2	2	1
1	1	2	1	1	1	2	1	2	1	1	1	1	1	1	1	1	1	1	1	1	1	2	2	1	1	1	2	1	3	2	3	1	2	1	2	1	2	1	1
1	1	2	1	1	2	2	1	1	3	1	1	1	1	2	1	1	1	1	2	1	1	2	3	2	2	2	2	3	3	2	2	1	3	3	1	2	2	2	3
3	5	5	2	4	2	5	3	2	3	1	2	3	1	1	2	2	2	1	1	1	2	1	2	1	3	1	1	2	1	3	2	2	3	3	2	1	3	1	2
2	1	2	2	1	3	2	2	2	2	1	2	3	2	3	3	3	3	2	4	4	3	2	3	3	4	3	3	3	3	2	4	4	4	5	3	3	3	2	3
3	1	1	1	1	2	2	1	2	2	3	2	1	2	1	2	1	1	1	1	2	3	1	2	3	3	2	3	3	3	1	2	2	3	3	2	1	2	1	1
2	1	2	2	1	1	1	1	2	2	2	2	2	2	3	3	2	3	1	3	2	3	4	3	1	5	4	5	5	3	2	2	2	3	2	2	2	3	2	3
1	1	2	1	1	1	1	1	1	2	1	1	3	1	2	1	1	1	1	1	1	2	1	2	1	1	1	1	2	1	2	1	2	3	2	2	2	1	2	2
4	5	3	5	2	5	3	2	3	3	2	2	1	1	2	2	2	3	2	1	2	3	2	3	2	2	3	4	3	3	3	5	4	4	2	4	3	4	2	4
3	4	4	4	3	1	4	2	5	2	1	1	2	1	3	1	1	1	1	1	2	1	1	2	1	1	1	1	2	2	1	1	1	1	1	1	1	3	2	1
2	2	4	5	2	1	2	2	1	2	1	1	2	1	1	1	1	1	1	2	1	1	2	1	1	1	1	1	1	2	3	2	1	3	1	2	1	3	2	3
5	4	4	3	5	4	4	3	3	3	2	3	3	2	4	4	4	3	2	3	2	2	2	2	3	2	3	2	3	3	2	2	2	1	1	2	2	2	5	2
3	2	2	3	2	2	1	2	3	2	3	3	1	2	2	2	3	3	2	3	2	3	5	2	3	3	2	1	3	3	2	2	1	3	2	3	1	3	1	1
4	2	3	2	3	2	5	3	3	5	1	3	3	2	2	2	2	3	2	3	2	3	2	3	3	3	2	3	2	5	4	3	4	4	2	3	2	3	2	4
1	1	1	1	1	1	2	1	1	2	2	1	1	1	1	2	1	2	1	1	1	1	1	2	2	1	2	1	1	2	2	1	1	1	1	1	1	1	2	1
1	2	4	5	2	2	5	2	4	2	5	4	5	5	2	3	3	5	3	4	5	3	5	3	5	5	3	3	5	3	3	3	5	5	3	5	3	4	2	4
5	1	1	1	1	2	1	2	2	1	2	2	1	2	2	3	2	3	3	2	1	2	1	1	1	3	1	1	1	2	2	2	2	1	2	3	2	3	2	2
3	2	3	3	2	5	2	1	1	2	3	3	1	1	3	3	4	3	1	3	1	3	2	1	2	2	2	2	2	2	2	2	3	3	2	4	2	3	3	4
3	3	2	1	5	2	3	2	4	3	5	5	3	2	5	5	3	4	2	5	4	5	5	3	5	3	5	3	4	4	4	5	5	3	3	3	2	3	2	4
1	1	2	1	2	2	1	1	1	1	1	1	1	1	1	2	3	1	1	1	1	1	1	2	1	3	2	1	2	2	1	1	1	2	1	1	1	1	1	2
1	1	1	1	1	1	1	1	1	1	1	3	1	1	2	2	1	1	1	2	2	1	1	1	1	1	2	1	2	1	1	1	2	2	1	1	1	1	2	2
4	2	3	3	2	2	2	3	3	3	1	1	1	1	2	2	1	2	1	2	2	4	2	3	4	2	2	2	3	4	5	3	3	3	5	3	2	4	5	3
1	4	2	3	2	2	2	1	3	4	2	2	2	1	1	2	3	3	1	3	1	3	1	5	3	2	2	3	2	3	3	1	3	3	1	3	2	3	2	4
1	2	3	3	2	2	3	2	4	2	2	3	5	3	2	2	3	5	1	3	1	1	1	2	1	2	1	1	1	1	3	4	5	5	2	5	2	3	5	4
2	2	3	2	1	2	3	3	2	2	1	2	2	1	2	1	2	1	1	2	1	4	2	5	2	2	3	2	3	2	3	3	3	4	2	3	3	3	5	3
2	2	2	3	2	2	2	2	2	3	3	2	5	1	3	3	2	2	1	3	2	1	1	2	1	1	1	1	1	1	3	5	5	5	4	5	5	3	4	3
1	1	3	2	2	1	3	2	2	1	1	1	2	1	3	1	3	1	1	3	1	1	1	2	2	2	1	1	2	2	2	1	1	1	1	3	2	3	2	1
1	1	2	1	2	2	3	1	2	3	4	4	3	3	3	3	5	5	2	3	2	5	2	2	5	3	3	4	3	3	3	3	2	3	2	3	2	1	2	3
3	2	3	5	5	5	3	3	2	2	2	3	2	1	3	4	3	2	3	4	4	3	5	2	2	3	3	3	2	3	5	5	3	3	2	5	2	4	5	5
3	2	2	2	2	2	3	2	2	3	3	4	2	2	3	3	2	2	3	3	1	3	1	1	1	3	1	1	3	3	1	1	2	1	1	1	1	1	2	2
2	2	1	1	1	1	2	1	1	2	3	2	2	2	2	3	3	2	1	3	1	1	1	2	1	1	2	1	2	2	3	1	2	3	3	5	2	2	2	3
3	1	3	2	1	1	2	1	2	1	1	1	2	1	2	1	3	1	1	1	2	3	2	2	1	2	2	2	2	1	2	1	2	2	1	1	1	1	1	1
2	2	2	1	3	1	4	2	1	2	1	3	2	1	2	1	2	2	1	4	5	4	3	3	3	3	3	3	3	3	2	2	3	2	1	2	2	2	1	2
3	4	4	4	2	3	2	3	5	5	3	3	2	3	3	3	3	3	2	2	5	4	4	5	3	5	3	3	3	3	2	2	5	4	2	4	3	3	2	3
2	2	1	1	2	1	2	1	2	2	5	3	3	2	5	3	3	3	2	3	1	1	1	1	1	1	1	1	2	2	1	2	4	2	2	3	1	2	2	3
1	1	1	1	1	1	1	1	2	1	1	2	1	1	1	1	2	1	1	1	2	3	2	1	1	2	2	3	3	3	3	2	2	1	2	1	5	2	2	2
1	2	2	2	2	2	3	2	2	3	3	3	1	2	4	2	3	2	2	3	2	3	2	3	2	3	2	2	5	3	3	3	4	3	2	5	3	4	3	3
3	2	2	3	5	2	1	3	3	1	4	4	3	3	3	4	4	4	3	3	2	2	1	1	1	1	2	3	2	3	3	2	2	2	2	2	1	2	2	2
3	1	2	2	2	1	2	1	1	1	2	2	3	1	3	2	2	4	3	3	1	1	1	1	2	2	1	2	1	3	2	2	1	1	1	2	1	2	1	3
5	4	4	2	2	3	5	4	3	3	3	2	2	2	2	2	3	3	2	3	2	3	5	5	3	3	4	3	5	3	3	3	2	4	2	2	2	4	2	3
4	5	4	5	4	2	3	3	5	4	3	3	3	2	3	3	3	3	2	3	2	3	1	3	2	2	3	2	1	3	2	1	3	2	2	5	2	1	1	3
5	2	2	3	2	2	4	5	5	3	4	3	2	2	4	2	5	3	2	3	2	2	2	2	2	2	3	2	2	2	3	5	2	4	4	2	3	4	2	3
1	1	1	1	1	1	1	3	1	2	1	1	2	2	2	2	2	1	1	2	1	1	1	2	1	1	1	1	1	1	1	1	1	1	1	1	1	1	1	1
3	2	2	2	2	2	3	3	3	2	1	1	1	1	1	2	1	2	1	1	2	4	3	2	3	5	2	2	3	3	2	2	2	3	2	3	2	2	2	3
4	2	5	2	4	2	4	3	2	2	1	3	2	2	2	3	3	3	2	2	1	1	2	1	1	1	2	2	3	2	3	2	3	3	1	2	2	4	2	3
3	1	1	2	1	2	3	1	2	1	2	2	2	1	3	2	2	1	2	2	1	2	2	2	3	3	2	2	3	3	3	2	2	5	2	2	2	3	2	3
3	2	3	1	2	2	3	3	1	3	1	4	2	1	3	2	2	1	1	2	2	2	1	3	2	1	1	2	2	2	3	2	3	3	2	3	2	3	2	2
3	3	2	4	2	3	3	3	4	3	3	3	2	2	2	3	5	3	2	3	1	1	1	1	1	1	1	3	2	1	3	5	4	4	2	4	4	3	2	3
1	1	2	3	1	1	3	1	2	2	1	1	1	2	1	1	1	2	1	1	1	2	2	3	1	2	2	4	2	2	3	2	2	2	1	3	2	2	2	3
1	1	1	1	2	2	2	2	1	1	1	3	1	1	1	2	1	1	1	2	1	2	1	2	2	1	2	3	2	2	3	1	2	1	1	1	1	2	2	2
2	3	2	4	2	2	3	3	3	3	5	4	3	4	4	3	3	3	2	3	3	5	5	5	5	3	4	3	3	3	3	2	3	3	2	4	2	3	3	3
5	3	5	5	4	4	3	5	5	3	5	3	3	2	4	2	5	3	2	3	2	1	1	1	2	2	2	2	1	2	3	3	4	5	4	3	2	3	2	4
1	1	2	1	2	1	1	1	2	2	1	2	1	1	1	1	2	1	1	1	1	1	1	2	1	1	1	2	1	2	2	1	1	1	1	1	1	1	1	2
3	1	2	1	3	3	2	2	1	2	1	1	1	1	2	2	1	3	1	1	3	4	2	3	1	3	3	2	3	1	1	1	1	2	2	1	1	2	2	2
1	1	1	1	1	1	1	1	1	1	2	1	2	1	3	2	2	3	1	2	2	2	1	2	2	3	2	1	2	3	3	3	1	3	2	2	2	3	2	3
1	1	2	1	1	1	1	1	1	1	3	1	1	1	1	1	2	2	1	2	1	2	2	2	2	3	2	3	1	3	3	1	3	3	1	2	5	1	2	3
1	1	2	1	1	1	2	1	1	3	2	2	2	1	3	3	3	3	1	2	2	3	2	2	2	2	2	3	3	3	3	2	2	3	2	2	2	4	2	4
1	1	2	1	1	1	2	1	3	1	2	3	2	1	3	3	2	3	2	2	2	2	2	1	1	1	2	3	3	3	3	3	2	3	5	2	2	3	5	3
2	1	2	3	2	3	2	1	2	2	1	1	1	1	1	1	1	2	1	1	3	2	1	2	1	1	2	1	3	3	3	1	2	4	1	2	1	1	2	1
1	2	2	1	2	1	3	1	1	3	2	3	3	2	2	2	3	3	1	3	4	3	5	5	5	3	3	5	4	3	3	3	4	3	1	3	1	4	2	3
5	5	5	4	3	2	5	5	2	3	4	3	4	2	5	3	3	5	3	4	1	2	2	2	1	2	1	2	1	3	3	4	4	2	2	3	1	3	2	3
1	1	1	1	2	1	2	1	3	2	3	2	1	1	1	2	2	2	3	2	5	4	5	3	4	5	5	3	4	5	3	3	4	3	5	5	4	4	2	3
1	2	2	1	2	1	2	2	1	2	1	3	2	1	5	2	2	1	2	3	1	1	2	1	1	3	2	2	3	2	2	1	1	1	1	1	1	1	2	3
1	1	2	1	1	2	1	3	2	1	1	1	2	1	1	2	1	1	1	2	2	1	1	2	2	2	1	1	3	2	1	1	1	1	1	2	1	1	1	2
2	2	2	1	2	2	2	2	2	1	2	1	3	1	2	2	2	3	1	1	2	3	4	2	3	3	2	3	3	4	4	3	4	3	2	5	5	3	5	3
3	3	4	5	4	3	5	5	3	3	3	3	4	3	2	3	4	4	4	3	2	5	5	3	2	5	5	2	5	5	3	4	3	3	4	5	1	3	2	3
2	1	2	2	1	2	2	1	2	2	1	3	2	2	1	3	1	3	3	2	2	3	2	2	2	1	3	3	3	2	3	1	2	3	5	2	2	2	1	3
3	2	2	1	2	2	3	3	1	5	3	4	3	4	5	5	2	2	5	3	2	4	2	2	3	4	3	2	3	3	3	3	4	3	4	2	2	5	4	2
2	2	2	2	1	2	3	2	2	2	1	1	1	1	1	2	1	2	1	1	1	1	1	1	1	2	1	1	3	2	1	1	1	1	1	1	1	1	1	1
2	2	2	3	1	2	1	5	1	1	3	5	3	1	2	3	3	3	3	5	1	2	1	3	1	1	2	1	3	1	3	1	5	1	2	2	2	3	2	3
2	1	3	1	1	2	3	2	2	5	1	2	1	1	3	2	1	1	1	2	3	5	5	3	3	3	4	5	5	3	4	4	3	4	2	3	3	4	2	3
2	3	2	3	4	2	3	2	3	3	2	5	3	4	3	4	5	5	3	4	2	1	2	3	3	2	2	2	3	5	4	5	3	3	4	4	5	3	2	3
3	2	4	3	2	2	3	3	3	2	3	2	3	2	3	2	3	1	2	1	2	3	4	3	3	3	3	3	4	5	2	2	3	2	1	2	1	3	1	3
3	2	2	3	3	2	2	3	2	3	1	3	1	1	2	2	1	1	1	3	2	2	2	1	1	3	2	1	1	2	1	1	1	2	1	2	1	2	1	2
3	4	3	4	2	5	3	2	3	3	4	2	2	3	2	3	3	5	2	4	2	5	2	3	3	3	3	3	3	4	4	3	4	3	2	4	2	2	4	3
2	1	2	1	1	1	2	1	2	1	1	2	1	2	3	1	1	3	1	3	2	2	1	1	1	1	1	3	2	2	1	1	2	2	1	1	1	1	1	2
4	4	5	2	2	2	4	4	2	2	4	4	3	2	2	3	3	3	2	4	1	2	2	1	2	3	2	1	1	2	1	1	1	1	1	1	1	1	1	2
2	1	2	1	1	2	1	1	2	2	1	2	1	1	1	2	2	3	1	2	1	2	2	2	1	2	2	2	3	2	3	1	1	2	2	1	1	2	2	2
2	1	1	1	1	1	2	1	1	2	1	4	1	1	3	2	3	1	1	2	1	2	1	2	1	2	2	1	2	2	2	1	1	2	1	1	2	2	2	2
2	1	1	1	1	1	1	1	2	1	1	2	2	1	1	2	3	3	2	1	2	3	3	5	5	4	5	3	5	4	4	4	3	3	2	2	3	4	5	3
1	1	2	1	1	1	2	1	1	1	3	1	1	2	2	2	1	3	1	2	1	1	2	2	2	2	1	2	3	1	1	1	1	2	1	1	1	1	1	2
1	1	1	1	1	1	2	1	1	1	1	2	2	1	1	2	2	2	1	2	2	3	2	3	3	3	2	3	3	2	3	1	2	2	3	2	1	2	2	3
5	3	3	2	2	2	3	3	3	3	4	3	3	4	2	5	5	5	2	3	2	5	2	3	3	3	3	3	3	5	3	5	4	3	5	3	3	5	3	4
2	1	4	2	2	2	2	1	2	3	3	3	2	2	2	4	5	4	2	2	2	4	2	2	1	2	3	3	4	3	3	2	2	3	2	2	1	3	2	3
1	1	4	2	2	2	2	2	2	3	2	2	2	2	2	2	1	3	2	3	2	2	2	1	2	3	2	3	3	3	3	2	2	2	2	3	1	2	5	2
4	2	5	3	2	4	3	3	3	2	3	5	5	4	5	3	4	3	5	3	4	3	3	3	3	2	3	3	3	3	2	2	2	4	1	3	2	3	2	3
2	2	1	1	2	3	2	1	1	3	4	3	2	1	2	3	4	2	2	3	1	4	2	4	2	4	3	4	5	3	3	5	3	3	4	3	2	3	1	3
1	1	1	1	1	1	1	1	1	1	1	3	5	2	2	2	3	3	1	2	2	2	3	2	2	2	3	2	3	1	2	1	2	2	1	2	1	2	1	1
5	4	5	3	2	3	5	3	4	4	4	5	2	4	3	2	3	2	2	5	4	2	2	4	3	3	3	4	5	3	5	3	5	3	2	4	5	5	2	4
3	2	3	2	2	2	4	3	2	2	2	1	2	1	1	1	2	3	1	2	2	2	2	2	3	3	4	1	5	4	2	1	1	2	1	1	1	2	2	2
2	2	2	2	2	2	3	2	2	2	1	5	3	2	3	3	5	4	2	4	2	3	2	2	5	3	3	3	4	3	3	2	2	3	1	2	1	2	2	1
3	5	4	5	5	2	3	4	5	3	2	3	2	3	4	4	4	2	2	3	2	1	2	3	1	3	3	3	3	2	4	3	1	2	2	2	1	3	5	3
4	3	3	4	4	5	5	5	2	3	1	2	1	1	2	2	1	2	1	2	3	5	2	5	5	4	3	5	5	5	5	3	3	3	2	3	4	5	5	3
2	2	3	3	2	2	2	1	3	2	1	2	1	2	3	1	2	2	2	2	1	1	2	3	2	3	2	3	3	3	3	1	1	2	1	2	2	3	2	1
5	2	2	2	5	2	5	5	3	2	1	1	1	1	2	1	1	1	1	1	2	1	1	2	4	1	1	3	2	2	2	1	1	2	1	1	1	2	1	1
1	1	2	1	1	1	2	2	2	2	2	3	2	2	2	3	2	3	4	2	2	3	2	4	3	5	3	5	3	4	3	5	3	5	5	3	3	4	5	4
3	2	3	2	2	2	3	3	2	3	3	3	2	3	3	5	3	5	3	4	2	3	3	2	3	3	4	3	3	3	3	3	3	4	2	4	1	2	3	4
2	1	2	3	1	1	2	2	1	2	2	3	1	1	3	2	1	1	1	2	2	1	1	1	1	1	1	2	2	2	2	2	2	3	5	3	2	1	2	3
1	1	4	1	2	1	1	3	2	3	2	2	2	2	2	2	3	2	1	2	1	3	5	3	5	3	3	3	3	2	3	5	2	3	2	2	2	3	2	2
3	5	5	4	4	5	3	3	3	3	4	5	4	4	4	4	4	3	3	5	2	3	4	3	5	3	5	4	5	3	3	5	3	3	5	3	4	4	5	4
3	2	1	2	2	2	2	1	1	2	3	3	2	2	2	3	2	3	2	2	2	2	2	2	1	2	2	2	3	2	2	5	3	2	2	2	2	3	2	2
3	5	3	3	2	2	3	3	2	2	1	1	3	1	1	2	3	3	1	2	1	2	2	1	1	2	3	1	2	2	2	1	2	2	2	1	1	3	2	2
2	1	2	3	1	2	2	1	1	1	1	1	2	1	1	2	2	3	1	1	2	1	2	2	2	2	2	2	2	2	2	1	1	2	1	1	1	1	2	2
2	1	2	1	4	1	1	1	1	1	1	1	1	1	2	1	1	1	1	1	1	2	1	2	1	2	1	1	2	2	2	2	2	2	1	3	1	3	2	3
1	1	2	1	1	1	1	1	2	1	1	2	2	1	2	2	1	2	1	2	1	2	1	1	1	1	2	1	1	1	1	1	1	2	1	1	1	1	1	2
3	1	3	2	2	2	3	3	2	3	1	2	1	2	2	2	3	2	1	2	2	2	2	3	2	3	2	2	3	3	2	2	3	3	2	2	1	2	2	2
3	2	2	3	2	2	3	2	1	3	1	1	1	1	1	1	1	2	2	1	2	1	2	1	2	1	2	1	1	1	2	1	2	1	1	2	1	2	1	2
3	3	3	4	3	5	3	3	3	3	4	2	3	1	3	3	3	3	2	3	2	3	2	2	2	2	3	2	5	3	3	3	3	2	2	4	1	2	2	3
1	1	2	1	1	1	1	2	2	1	1	1	1	1	2	1	2	1	1	2	1	1	2	1	2	1	2	2	2	1	1	1	1	1	1	1	1	1	2	2
2	1	1	1	1	1	1	1	1	1	1	3	2	1	3	2	2	2	2	3	1	1	1	1	1	2	2	2	1	1	3	1	1	2	1	1	1	1	1	1
1	1	2	1	2	1	1	1	2	2	2	2	1	1	2	3	3	2	1	1	1	2	2	1	5	2	2	2	3	3	2	1	2	1	1	3	1	1	2	3
1	1	2	1	1	1	2	1	1	1	4	5	4	3	3	4	5	3	4	5	1	1	1	1	1	2	1	1	1	1	1	1	1	1	1	2	1	1	1	2
2	1	2	1	1	2	1	1	2	1	2	1	1	1	1	1	2	2	1	2	2	3	2	2	3	3	3	2	3	3	4	5	3	5	5	3	5	5	5	3
3	4	5	4	2	3	4	5	3	2	2	1	2	2	2	2	3	3	2	2	3	3	2	3	5	3	5	3	3	4	3	2	2	3	1	2	1	2	3	2
3	2	2	2	1	2	2	2	2	2	3	3	3	1	4	2	3	3	2	3	3	3	5	3	2	2	5	4	3	3	3	3	2	3	2	2	2	3	2	3
1	1	2	1	1	1	2	1	1	1	1	1	2	1	1	1	2	3	1	2	2	3	2	3	2	1	3	2	3	3	1	1	2	2	1	2	1	2	1	1
3	3	3	2	2	2	3	3	4	2	2	2	2	1	3	2	2	1	1	3	1	1	1	1	2	1	2	1	1	1	1	2	1	3	1	2	2	1	3	3
3	4	3	3	3	3	3	3	3	2	3	3	5	4	4	3	5	3	2	4	4	2	2	2	2	2	2	3	3	2	2	1	2	2	1	1	1	2	1	2
1	1	1	1	1	1	1	1	1	1	2	3	1	1	3	2	2	1	2	2	2	2	2	1	1	1	2	1	3	2	1	2	1	1	2	2	1	2	2	2
1	1	1	1	1	1	2	2	2	1	2	3	2	1	2	2	2	3	1	4	2	1	1	1	1	1	1	1	3	1	2	3	3	3	4	2	3	2	3	2
3	2	3	3	3	4	3	3	2	5	4	3	5	3	4	3	4	4	3	3	1	2	2	4	2	1	2	3	2	2	1	2	2	2	2	1	2	2	2	1
2	1	1	1	1	2	2	2	2	1	3	3	2	2	2	3	3	2	5	1	2	3	1	2	1	2	2	2	3	3	1	1	2	2	1	1	1	1	2	1
2	2	1	1	1	1	1	1	2	2	1	1	1	1	1	1	2	1	1	1	1	1	1	3	1	2	2	2	3	2	2	1	2	2	1	2	2	2	1	2
2	2	2	5	1	4	3	2	3	3	2	3	2	2	3	2	4	3	2	5	1	2	2	1	3	2	2	1	2	1	2	1	1	1	1	2	1	3	2	2
2	2	2	2	2	2	1	1	2	2	4	3	4	2	3	3	2	3	2	3	1	1	1	1	1	1	2	1	1	3	2	3	1	2	1	2	1	1	2	2
1	2	3	3	2	2	3	3	4	2	1	3	2	2	3	3	3	3	3	3	1	2	2	4	3	2	2	2	1	2	2	3	3	3	2	5	2	3	2	3
2	1	1	1	1	1	1	1	1	1	1	1	2	1	1	2	3	3	1	1	1	1	1	1	1	2	2	2	1	2	1	1	2	1	1	1	1	1	2	2
3	2	3	3	2	5	3	3	2	5	1	2	2	1	1	1	2	2	1	2	1	2	2	1	1	1	2	2	2	3	4	2	2	3	1	2	2	3	1	3
3	2	1	2	1	2	3	1	1	3	1	2	2	1	1	3	1	2	1	1	3	5	5	4	4	3	4	3	3	5	2	1	2	2	1	3	1	2	1	3
3	2	3	2	2	2	5	3	3	3	5	3	2	2	3	3	4	3	1	3	4	3	2	3	2	2	3	3	3	3	3	2	2	2	1	1	1	2	1	2
2	2	3	5	1	1	5	3	3	4	3	2	4	2	5	3	5	4	1	4	2	3	1	4	3	5	3	2	3	3	1	3	3	3	1	2	2	3	2	2
2	1	3	1	2	2	2	2	2	1	2	2	2	2	3	2	2	3	2	3	1	1	1	2	1	3	1	2	1	1	1	1	2	2	2	1	1	2	1	2
4	2	3	4	2	5	4	4	3	3	1	2	3	1	2	2	3	3	2	2	2	2	1	5	2	2	4	3	3	4	3	3	3	3	5	2	5	4	4	5
3	2	2	1	1	2	4	4	3	3	1	2	2	2	2	2	1	3	1	2	1	2	3	2	1	3	1	2	1	3	3	2	3	3	1	2	1	2	2	1
3	1	2	1	2	2	1	1	2	3	2	1	3	1	1	2	2	3	2	1	2	3	2	2	2	1	3	2	3	3	3	2	2	3	1	5	2	3	2	3
2	1	1	1	1	1	1	1	1	2	1	1	1	1	2	2	2	2	1	1	2	2	2	2	4	2	3	1	3	3	2	3	2	1	2	2	1	1	2	3
3	3	4	3	5	3	3	4	5	4	3	3	3	3	3	3	3	5	2	3	4	3	3	4	3	4	2	4	3	3	3	3	3	3	2	3	2	3	4	4
3	3	3	3	2	2	2	5	3	4	3	3	4	2	5	3	2	5	2	4	2	3	2	3	5	3	3	3	3	3	1	1	2	3	1	2	2	3	1	1
4	5	2	5	2	2	2	3	4	3	2	3	2	1	2	2	2	2	1	2	1	1	5	2	2	2	2	2	5	3	3	2	3	5	2	2	1	2	4	3
2	1	2	1	1	1	2	1	1	2	1	1	1	1	1	2	2	1	1	1	2	1	1	1	3	2	2	2	3	3	3	2	1	3	1	2	1	1	1	1
4	4	4	5	5	2	2	5	3	3	4	2	2	1	1	1	3	2	1	1	4	3	3	3	3	4	4	3	4	3	3	4	3	3	2	5	2	4	4	3
5	4	3	2	5	2	3	5	3	4	1	2	2	2	3	3	2	2	1	2	2	2	2	1	1	2	2	1	3	1	1	1	2	3	1	2	2	3	1	1
1	2	2	2	1	2	1	3	3	2	2	3	4	4	3	2	2	3	3	3	2	3	1	5	2	3	3	3	2	4	2	1	1	1	1	2	1	2	1	2
5	4	2	5	2	3	4	3	3	4	1	2	1	1	1	2	1	2	1	2	1	4	2	3	2	1	2	1	3	3	3	4	2	3	2	3	2	3	2	3
2	2	1	1	1	1	3	1	2	1	1	1	2	1	1	2	2	2	1	2	1	1	1	1	2	2	1	1	1	2	1	1	1	2	1	1	1	2	1	1
3	2	2	3	2	2	3	3	2	5	2	3	4	2	4	2	1	2	1	5	1	1	2	1	1	1	1	1	1	2	2	2	4	2	2	3	2	3	1	3
5	3	3	3	4	2	4	3	4	5	3	3	3	2	3	3	2	2	1	3	2	3	2	4	3	3	3	3	3	3	2	3	3	5	1	3	2	4	2	3
1	2	2	2	3	2	1	2	2	2	3	3	3	4	3	3	4	5	3	4	2	5	4	5	3	3	5	5	3	5	4	4	5	5	2	4	2	3	3	5
2	4	3	2	2	4	3	3	3	5	1	2	2	1	2	2	2	2	1	1	2	3	2	2	3	1	2	2	1	3	1	1	2	2	1	3	1	2	2	1
2	2	2	1	2	2	1	2	2	2	4	5	4	5	3	4	3	4	4	5	2	4	1	3	2	1	2	3	3	3	3	1	1	4	1	2	2	3	2	3
3	3	3	3	2	4	3	3	5	5	2	3	3	2	3	3	2	3	1	3	4	3	2	3	2	5	3	1	3	3	1	2	3	3	1	3	2	3	1	3
1	1	2	1	1	1	1	1	1	1	3	4	5	2	3	5	5	3	3	4	1	2	1	1	1	2	2	2	2	3	3	1	2	2	2	1	2	1	2	1
2	2	2	1	2	1	1	1	3	1	3	3	2	1	4	4	3	3	1	2	1	3	1	3	1	2	2	2	3	3	3	3	2	3	1	3	2	2	1	2
2	2	3	3	2	2	3	2	3	3	3	4	5	2	3	4	4	3	3	3	2	3	2	3	2	1	2	2	5	3	2	3	1	3	2	2	3	3	5	3
1	1	1	1	1	1	1	1	1	1	1	1	1	1	2	1	1	1	1	1	1	1	1	1	1	2	2	1	1	1	1	1	1	1	2	2	2	3	2	2
3	1	2	1	1	2	1	3	1	1	2	1	1	1	2	2	1	1	1	1	1	3	4	4	3	5	4	2	3	5	2	1	3	3	1	3	2	1	2	2
3	3	3	3	4	5	5	4	3	3	2	2	4	2	2	2	2	3	2	3	2	4	2	2	3	3	3	4	3	3	3	3	2	3	2	3	2	5	2	3
2	2	2	3	1	2	3	1	1	3	1	1	2	1	1	1	2	2	2	1	1	1	1	1	2	1	1	1	2	2	1	1	1	2	1	2	2	3	1	1
3	2	3	3	4	2	2	4	3	5	2	3	3	3	5	4	3	5	4	3	5	2	4	1	3	3	5	2	4	5	2	1	2	3	3	2	2	2	2	2
3	3	2	3	3	3	1	3	2	4	2	1	2	1	1	2	1	2	1	1	2	3	2	3	2	3	2	2	1	3	1	2	3	3	1	3	1	2	1	3
2	1	2	1	2	2	2	1	2	1	1	1	1	1	1	1	2	2	1	2	2	3	2	3	3	3	3	2	3	3	2	1	3	3	2	2	2	1	1	2
1	2	2	1	2	2	1	1	2	2	1	2	1	1	2	2	2	3	1	2	1	3	2	2	5	3	3	3	4	3	2	1	1	1	1	1	1	1	1	1
3	2	3	5	2	2	3	3	1	5	1	1	1	1	1	1	2	3	1	2	3	3	3	3	5	3	4	4	3	4	3	2	3	2	3	3	2	2	2	2
2	1	2	3	1	1	2	2	3	2	1	1	1	1	1	2	1	1	1	2	2	1	2	2	1	1	2	3	2	2	1	1	1	1	1	1	1	1	1	3
2	1	2	1	1	2	2	1	1	2	3	3	2	2	3	3	1	2	2	3	3	1	2	4	2	3	2	3	3	3	3	1	1	1	1	1	1	1	1	1
3	2	2	2	4	2	4	3	3	3	3	4	3	2	2	3	2	3	3	2	2	3	2	2	4	5	3	2	3	3	3	3	2	3	3	3	2	3	2	5
2	2	3	3	1	2	3	4	3	3	5	3	2	4	4	5	3	3	2	4	2	4	5	5	3	3	3	5	3	4	4	5	2	3	5	2	1	3	2	3
1	1	2	2	2	2	3	3	3	2	2	2	2	1	2	2	3	4	2	3	2	3	2	2	2	2	5	3	3	4	3	2	1	2	1	4	1	2	2	1
3	2	3	3	5	2	5	3	5	4	1	3	3	2	3	3	4	3	2	4	5	5	2	3	2	3	4	5	5	4	3	2	2	3	5	2	2	1	2	2
1	1	1	1	1	1	1	1	1	1	2	2	2	1	2	2	4	2	2	2	2	1	1	1	1	2	2	1	1	1	2	2	1	1	1	3	1	1	2	2
3	4	2	4	2	4	5	3	3	5	2	1	1	2	1	1	2	5	1	2	1	1	1	2	1	1	2	1	1	1	1	3	2	2	5	2	2	5	2	3
2	2	2	3	1	2	2	3	1	3	2	2	2	1	2	2	1	1	1	1	2	2	2	4	2	2	3	2	3	3	2	1	1	1	1	2	1	1	1	3
1	2	2	4	1	1	4	1	3	3	3	2	2	2	1	2	2	2	2	2	2	3	2	2	2	3	2	3	3	5	2	1	2	4	1	2	1	2	1	3
5	1	5	3	3	5	3	3	3	2	2	3	3	2	2	2	3	3	2	2	2	2	2	2	3	2	2	2	4	2	3	2	2	3	2	2	3	3	2	3
1	1	2	2	2	1	2	2	3	2	2	1	1	1	1	2	1	2	1	1	2	3	1	2	2	2	2	1	2	2	3	2	2	2	1	3	1	3	3	4
3	2	3	3	2	2	2	2	3	5	4	3	3	5	5	4	4	3	3	3	5	5	3	3	4	5	5	4	3	4	3	3	2	3	2	3	2	3	4	2
2	2	4	3	4	2	2	3	3	5	3	3	4	2	4	2	2	3	3	3	1	1	1	1	2	1	2	2	1	1	1	1	2	1	1	2	2	2	1	2
1	1	1	1	1	2	1	1	2	2	1	1	1	1	1	2	1	1	1	1	1	2	1	1	1	2	2	2	3	2	1	1	1	1	1	1	2	1	1	1
5	4	5	5	3	3	3	3	5	3	2	1	1	2	2	2	1	3	2	1	2	3	2	3	3	5	3	3	3	3	3	2	4	3	3	5	4	3	2	4
3	2	2	2	2	1	3	2	2	1	3	3	3	4	3	2	3	3	1	3	2	2	1	1	2	2	3	2	2	3	3	2	5	3	5	3	3	2	1	2
3	2	3	3	4	4	3	5	3	3	2	4	3	4	3	4	3	3	5	4	3	3	2	4	4	3	3	3	3	3	4	3	4	4	1	3	2	3	2	3
2	2	1	1	1	2	1	1	1	1	1	2	1	1	2	3	1	1	1	1	1	3	2	1	2	1	2	4	1	2	3	1	4	3	4	2	2	2	1	2
1	2	3	2	2	4	2	2	2	2	1	2	1	2	2	2	1	1	1	2	2	3	2	2	3	4	3	3	3	5	1	1	3	3	1	3	2	2	1	2
2	2	2	1	2	1	2	3	2	2	1	1	1	1	1	2	1	2	1	1	1	1	1	1	1	2	1	2	2	1	1	1	1	1	1	2	1	2	1	1
1	1	1	1	1	1	1	2	1	2	1	1	1	1	1	1	1	1	1	1	2	1	2	1	3	3	2	1	3	3	2	1	1	2	1	1	1	2	1	3
3	2	2	4	2	2	3	3	2	5	3	3	5	4	3	3	3	3	4	3	1	3	2	3	2	3	3	3	3	4	3	3	3	3	2	4	2	3	3	5
2	1	2	1	1	1	2	1	1	3	1	1	1	1	2	2	1	2	2	1	5	3	1	3	1	2	2	3	2	3	2	2	2	1	1	2	2	3	2	3
4	2	3	3	5	2	3	4	2	2	2	2	3	2	2	2	3	3	4	2	3	4	2	2	2	3	3	5	3	3	3	5	2	3	4	2	3	2	2	3
1	1	2	1	1	1	3	1	2	2	4	2	2	1	2	1	2	3	1	2	1	2	1	2	3	2	3	1	3	3	3	2	1	3	1	2	3	3	2	3
2	1	1	1	1	2	2	1	2	3	1	1	2	2	1	2	1	3	1	2	2	2	1	3	1	1	2	2	1	3	3	5	2	4	3	4	1	2	2	3
4	3	3	3	2	4	3	3	2	5	4	2	3	2	2	3	2	3	4	2	5	4	5	2	2	3	4	4	3	3	3	4	5	4	2	5	2	4	4	4
3	3	5	2	2	2	4	2	4	3	3	3	2	2	2	3	2	5	3	3	2	3	2	3	2	2	2	1	1	3	5	3	3	3	3	3	2	3	2	3
2	1	2	1	1	2	1	3	2	3	1	2	1	1	1	1	1	1	1	2	2	4	2	3	3	3	2	3	2	2	4	3	3	3	2	1	3	3	5	4
2	1	2	1	4	2	1	3	1	3	4	3	5	5	5	4	3	5	4	4	4	4	3	5	3	3	3	3	3	3	3	2	3	3	1	2	1	3	2	4
3	2	4	3	4	5	3	4	4	2	3	4	5	3	3	3	3	3	3	2	3	3	2	3	3	3	3	2	3	5	3	3	3	2	2	1	2	2	1	2
1	2	2	1	1	3	2	2	2	1	1	3	2	1	4	3	2	3	2	2	1	1	2	3	2	1	2	1	1	2	1	1	1	1	1	1	1	1	1	1
1	1	2	1	1	2	1	1	3	1	1	2	1	1	1	1	1	2	1	2	2	3	2	1	1	1	2	1	2	1	2	1	1	1	1	2	1	2	1	3
3	2	5	5	1	4	3	2	2	3	1	3	2	2	3	2	2	2	1	2	2	2	1	1	4	2	2	2	3	2	1	1	1	1	1	2	1	2	1	2
1	1	2	1	1	1	2	1	2	2	4	3	3	2	3	3	4	5	2	2	1	1	1	2	1	1	1	1	1	1	2	1	2	2	2	1	2	3	2	2
4	1	2	4	2	2	3	2	2	4	2	2	3	2	3	2	1	3	2	3	2	2	1	1	2	2	3	1	3	3	2	1	2	3	1	3	1	1	1	1
3	2	2	3	2	2	4	1	3	2	4	4	1	4	3	4	2	2	2	4	4	4	4	5	5	5	3	5	3	3	2	2	2	3	1	2	1	3	1	2
2	1	3	1	2	1	1	2	1	2	2	1	2	1	1	2	2	3	1	1	2	3	2	4	1	5	2	2	2	2	1	1	1	1	1	1	1	1	1	3
2	2	2	3	2	2	3	2	3	3	3	5	4	3	3	3	3	3	3	3	2	2	3	4	2	2	5	4	4	3	3	2	1	3	2	1	1	3	2	2
2	4	4	5	3	3	3	5	5	5	4	3	3	2	3	4	5	3	2	3	2	1	2	2	2	2	2	3	2	2	3	3	3	4	4	3	2	3	4	3
1	1	1	1	2	1	1	1	1	2	1	2	1	1	1	2	1	1	1	1	2	2	1	1	2	1	2	1	1	2	3	4	4	3	2	3	2	3	4	5
